# Supplementary material for: Total synthesis and stereochemical revision of lagunamide A
Source: Royal Society of Chemistry journal article supplement (doi:10.1039/c2cc34187e), 2012-01-01
Supplement: c2cc34187e.pdf [file c2cc34187e.pdf]

# Total Synthesis and Stereochemical Revision of Lagunamide A

Lu Dai,<sup>a</sup>Bo Chen,<sup>a</sup>Zhuo Wang,<sup>b</sup>Yuqing Liu,<sup>b</sup> Zhengshuang Xu,<sup>\* a,b</sup>Tao Ye<sup>\*a,b</sup>

<sup>a</sup>Key Laboratory of Chemical Genomics, Peking University Shenzhen Graduate School, University Town of Shenzhen, Xili, Nanshan District, Shenzhen, China, 518055; E-mail: bctaoye@inet.polyu.edu.hk; xuzs@pkusz.edu.cn

<sup>b</sup>Department of Applied Biology & Chemical Technology, The Hong Kong Polytechnic University, Hung Hom, Kowloon, Hong Kong, China Tel: +852 34008722; E-mail: bctaoye@inet.polyu.edu.hk

**Spectra for key intermediates and final products**

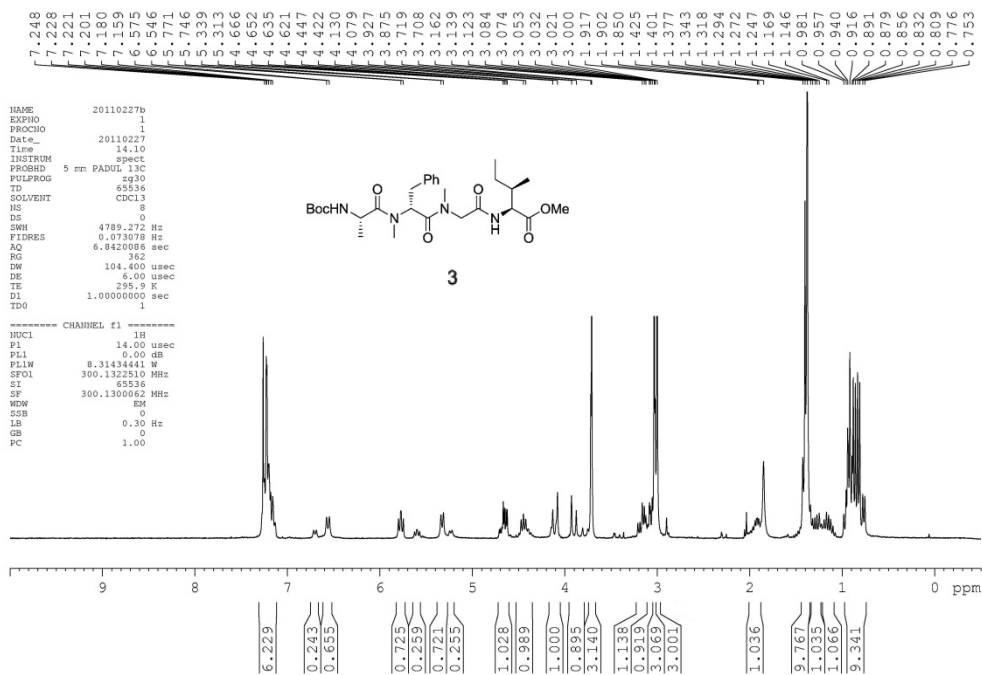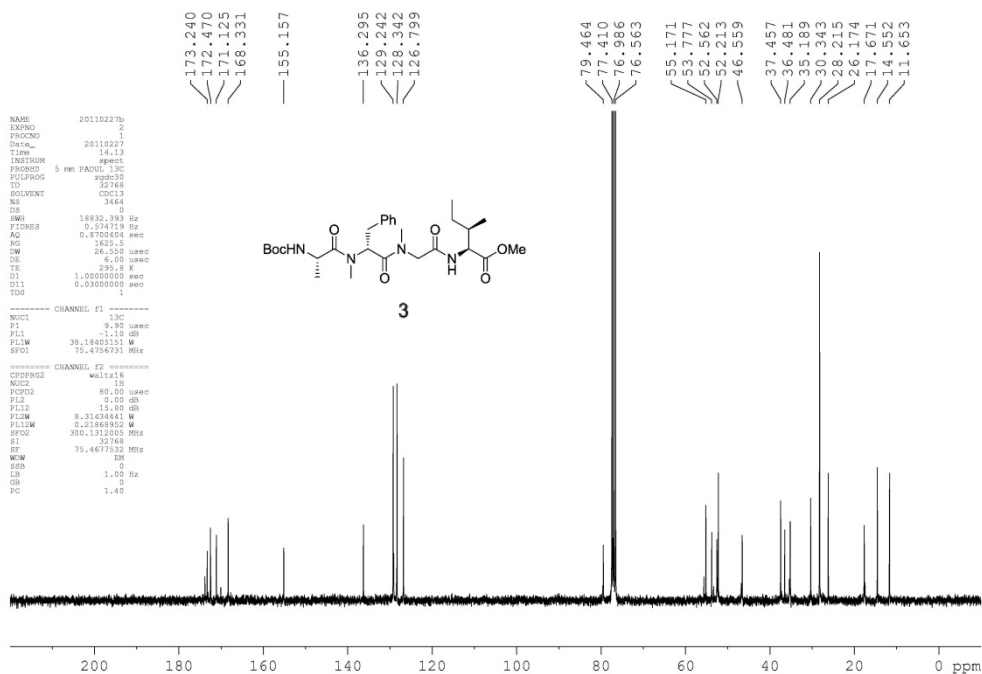

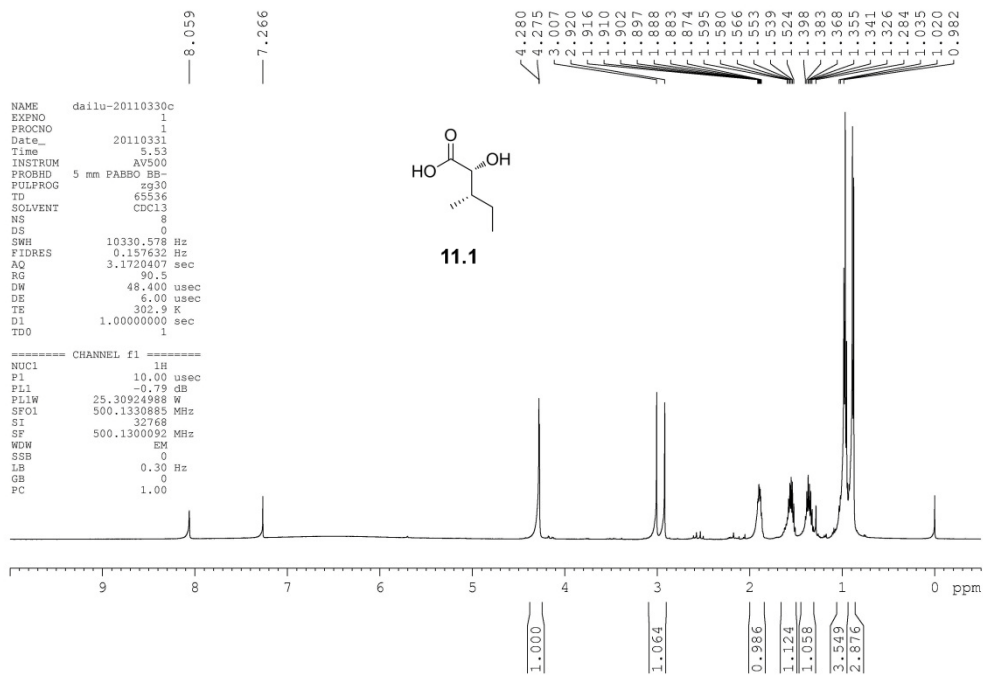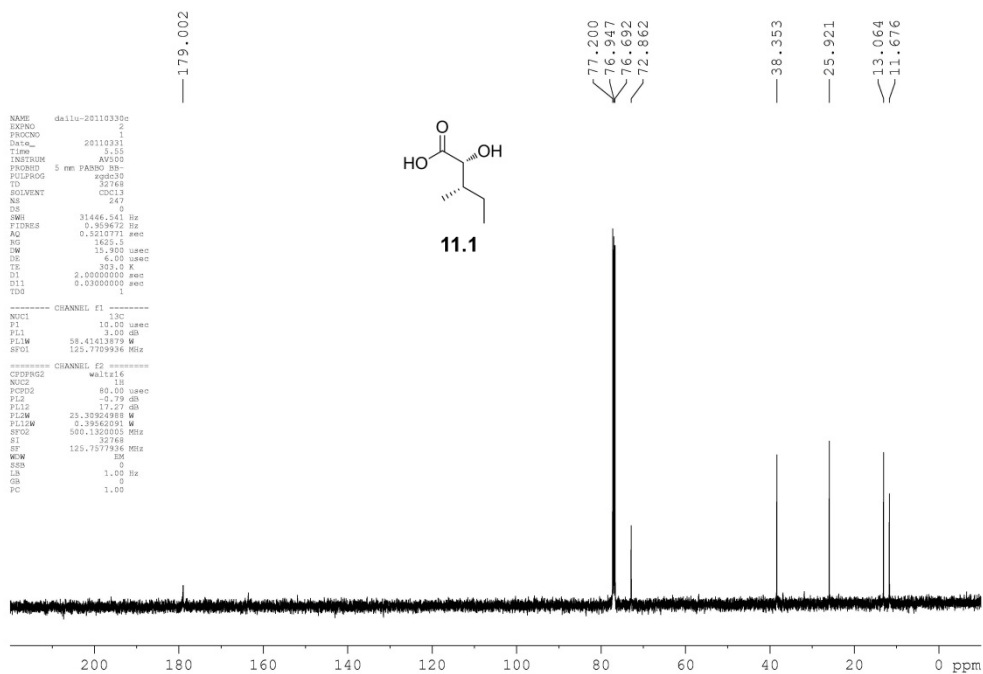

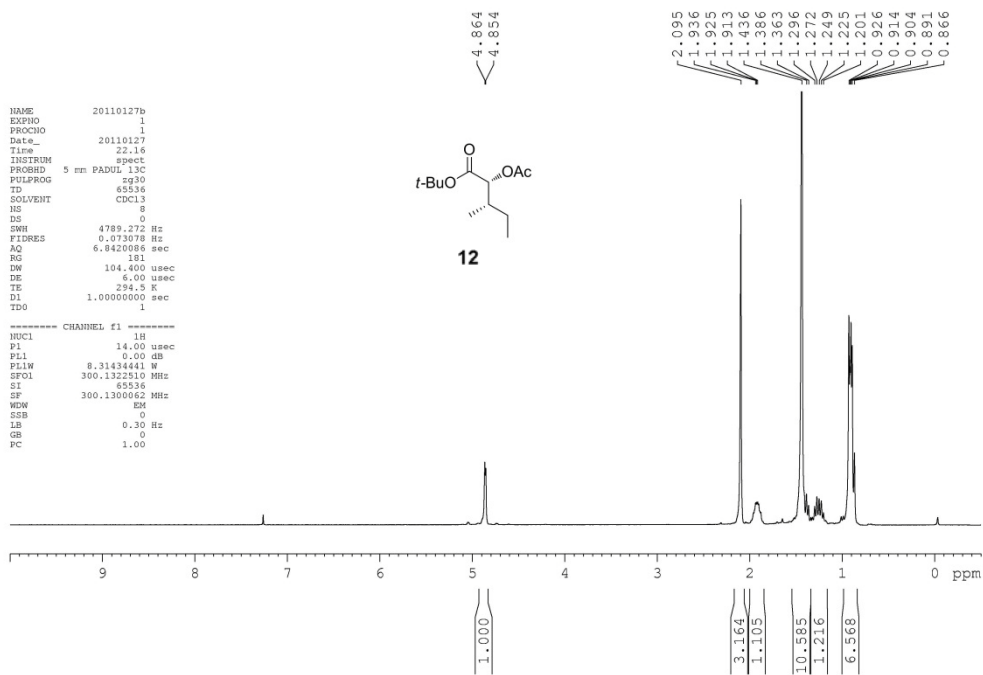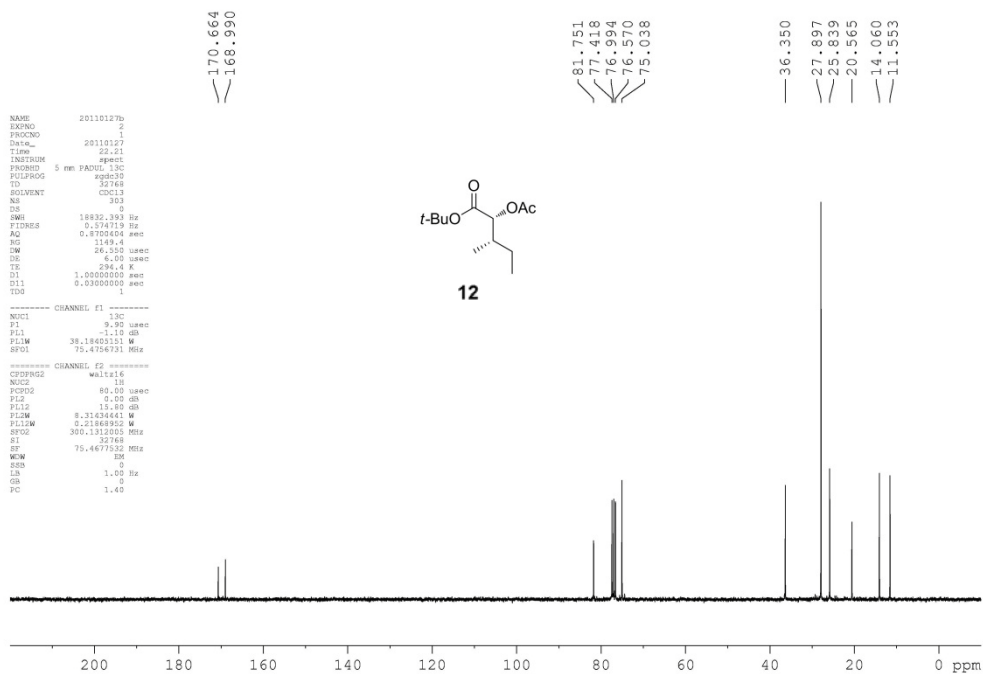



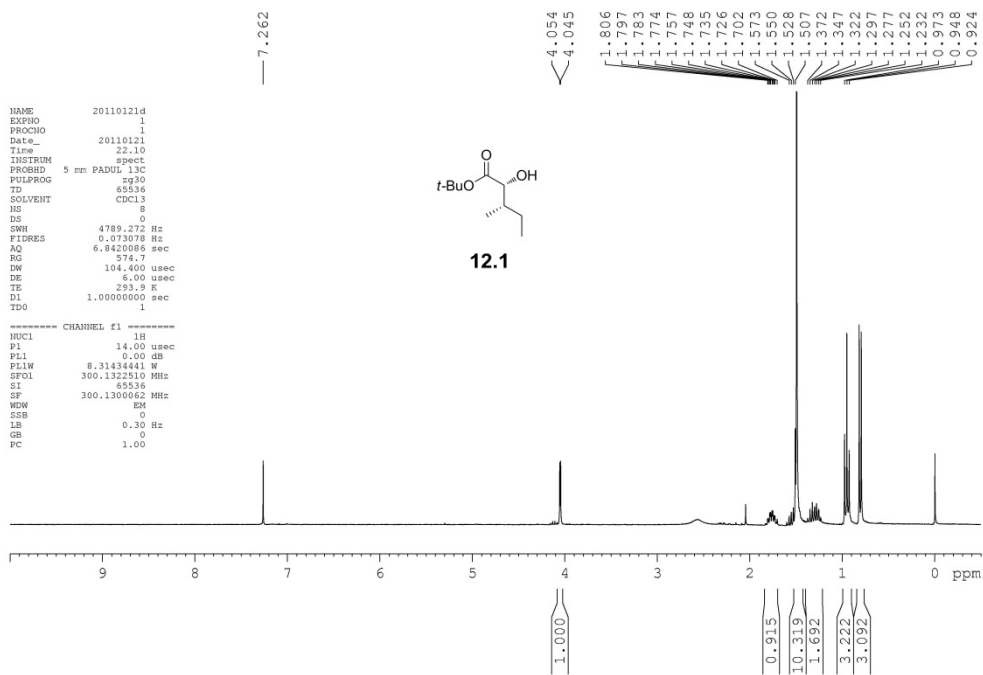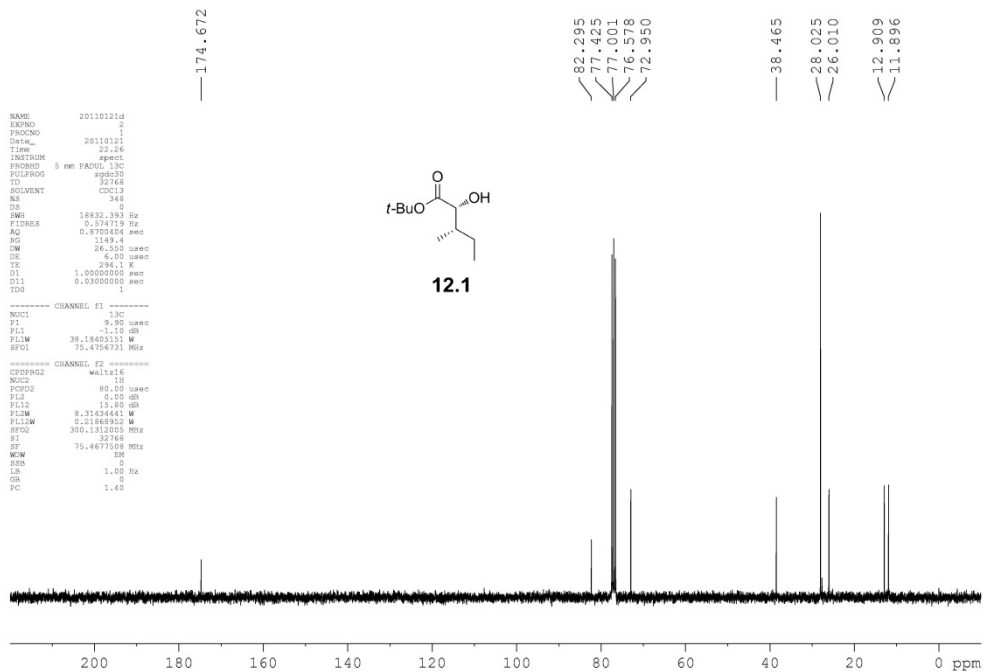

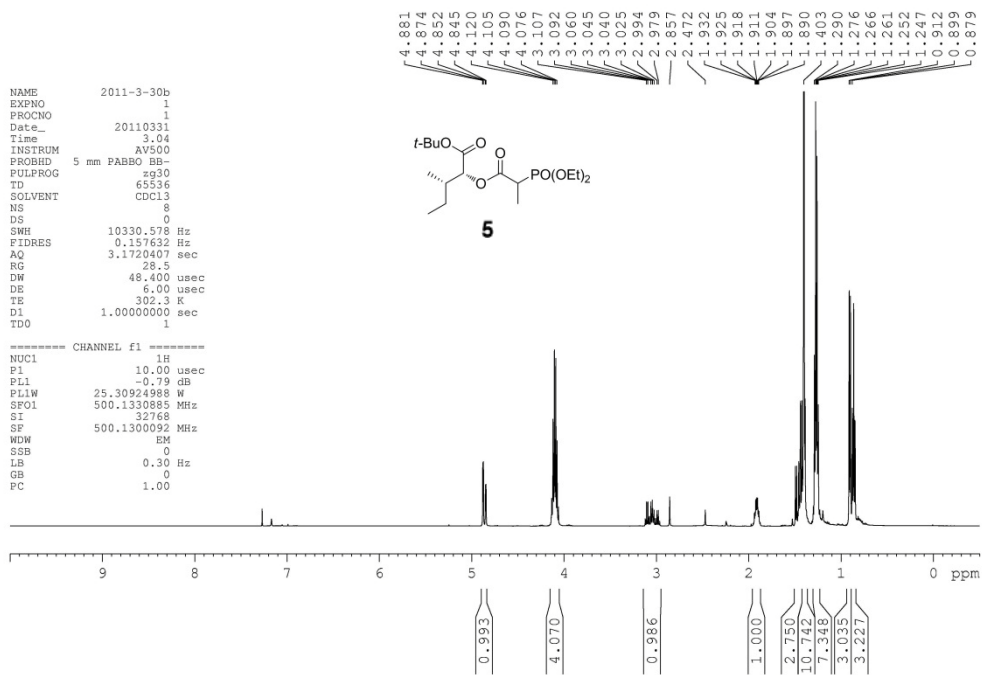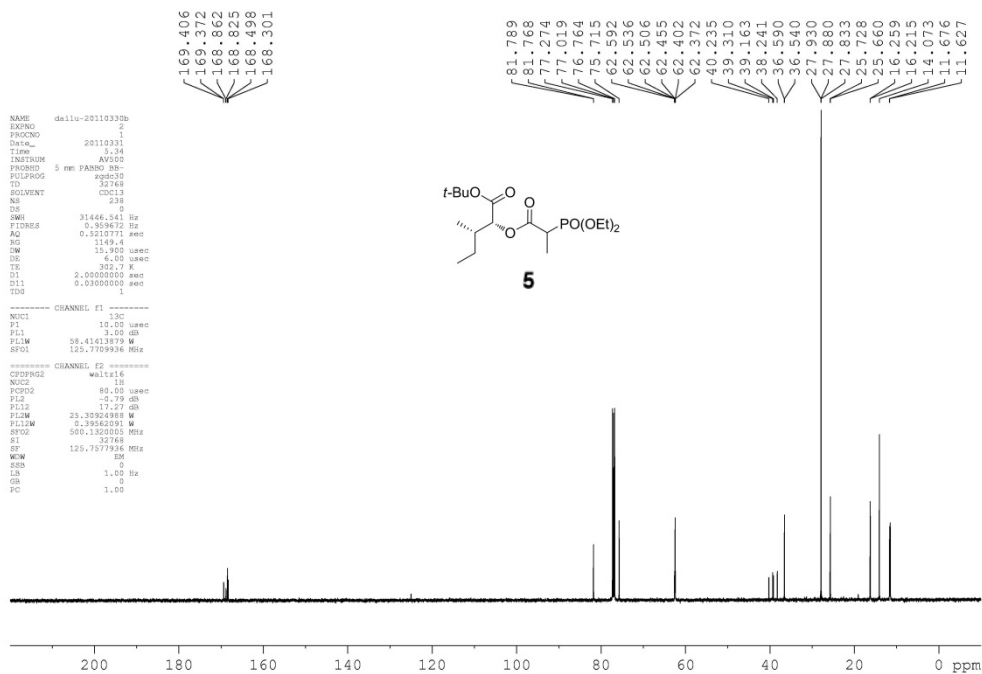

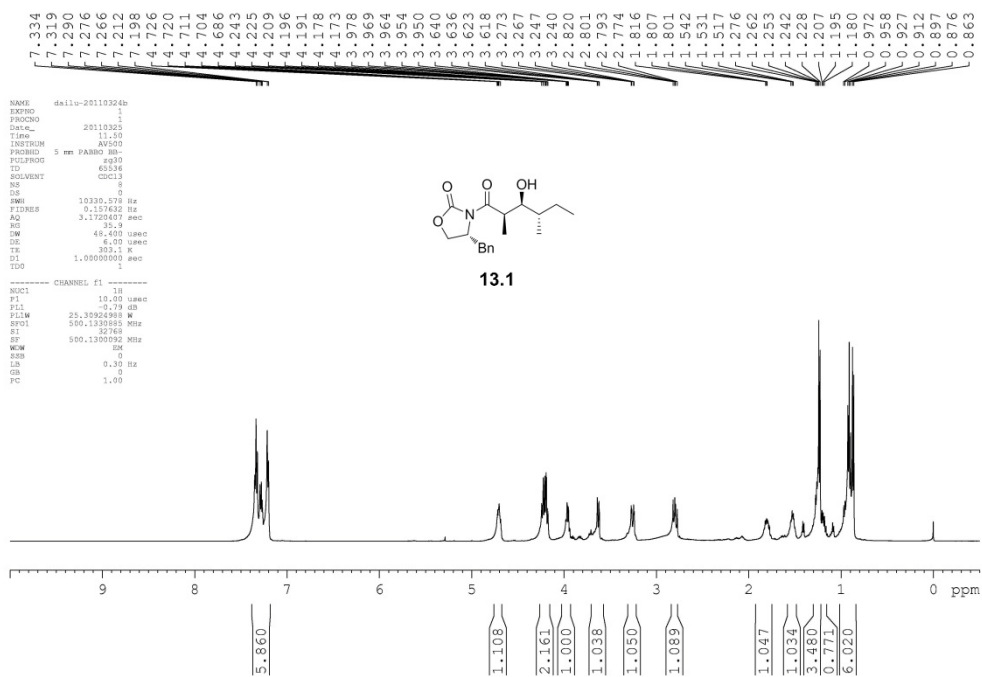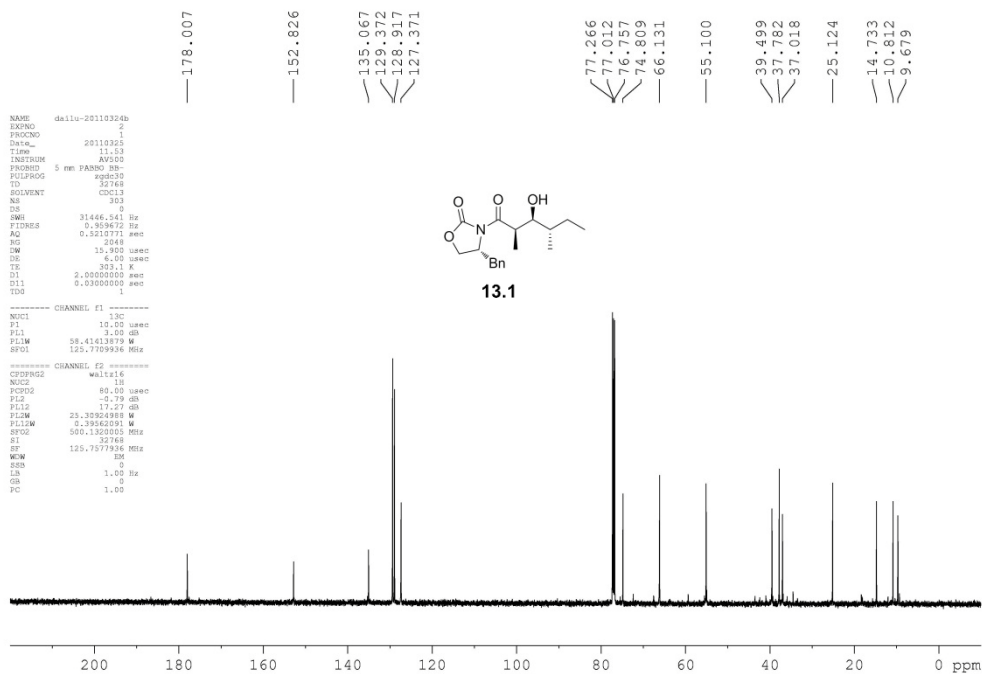

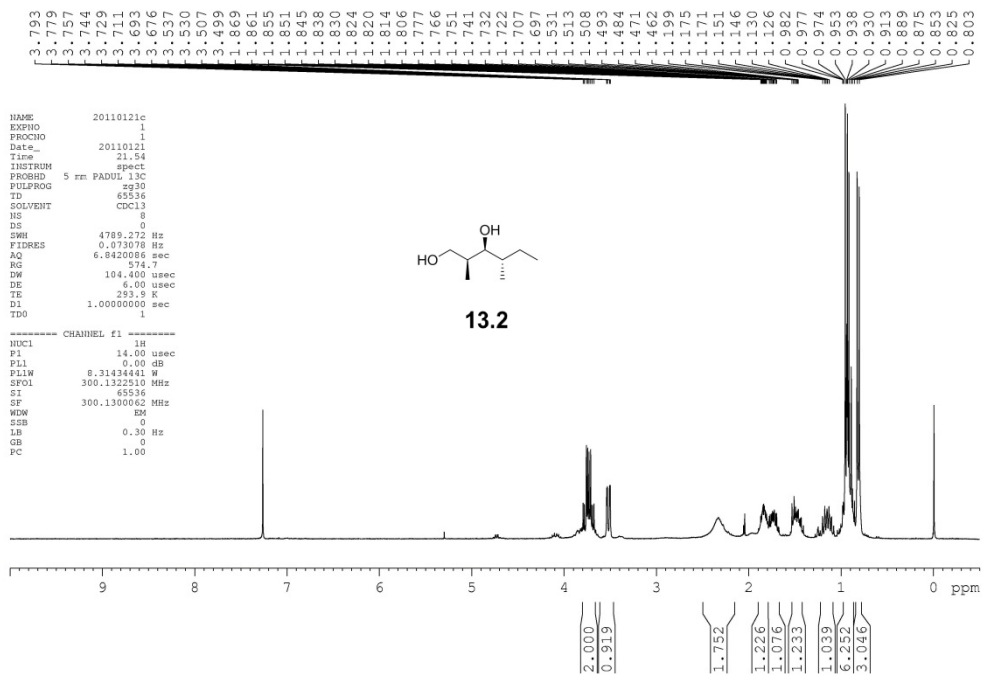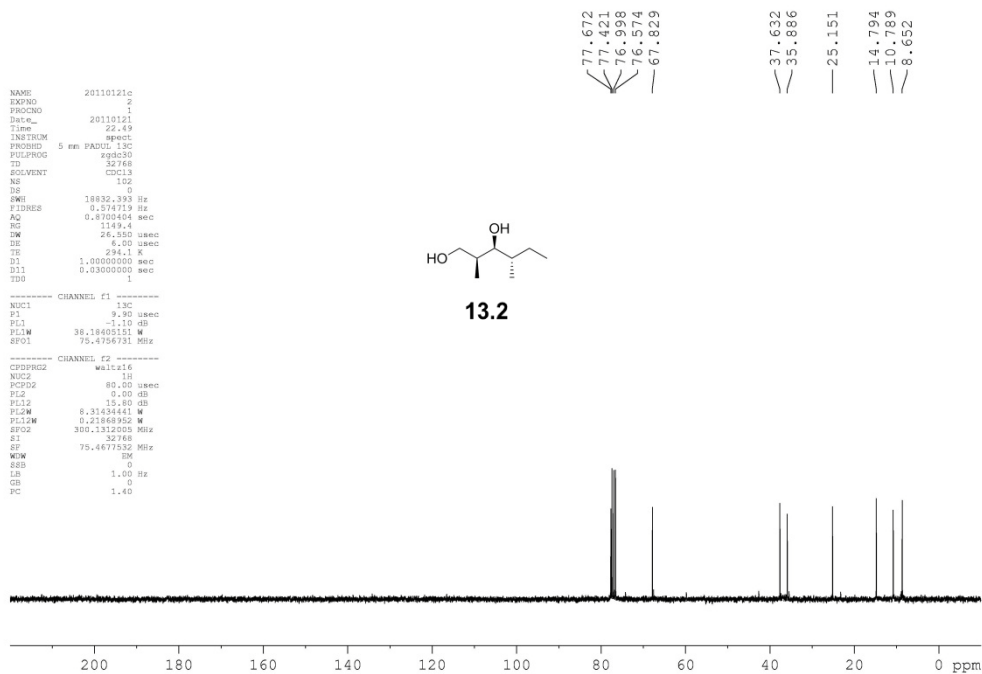

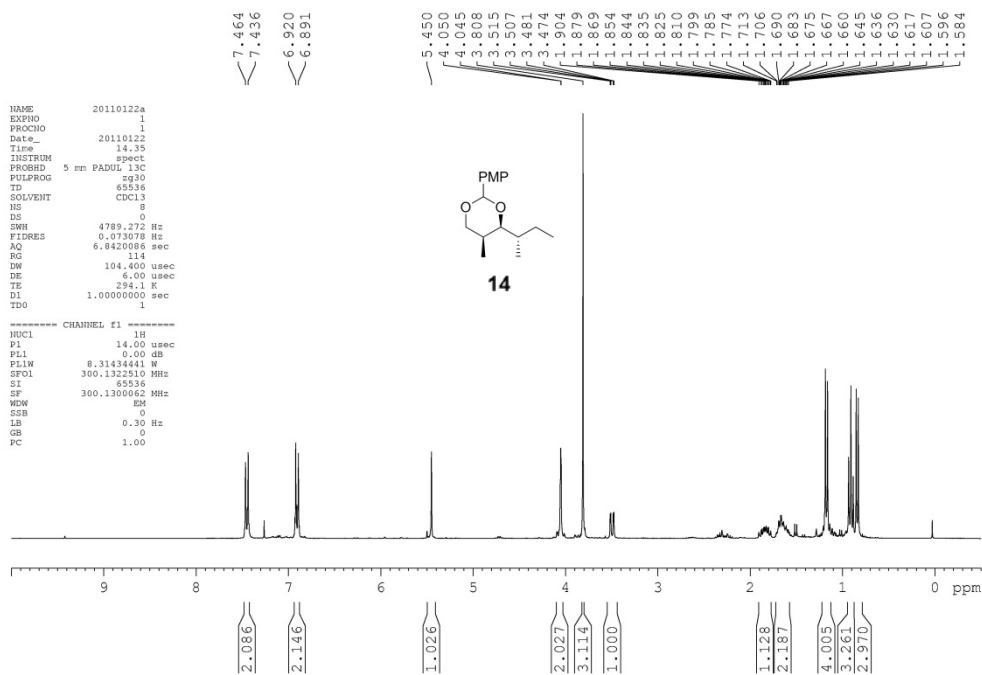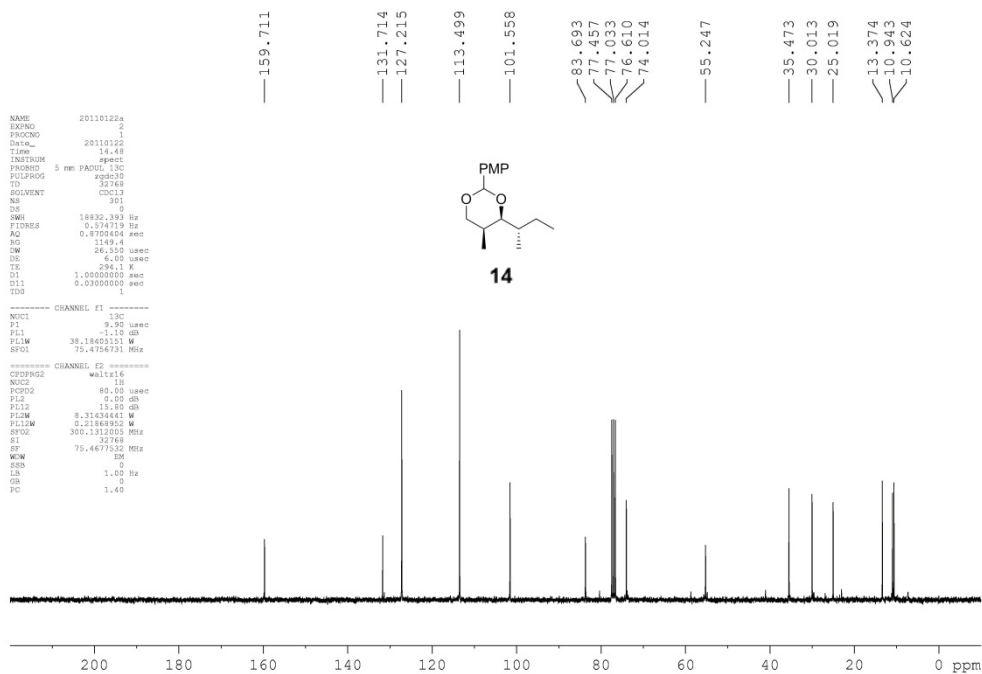

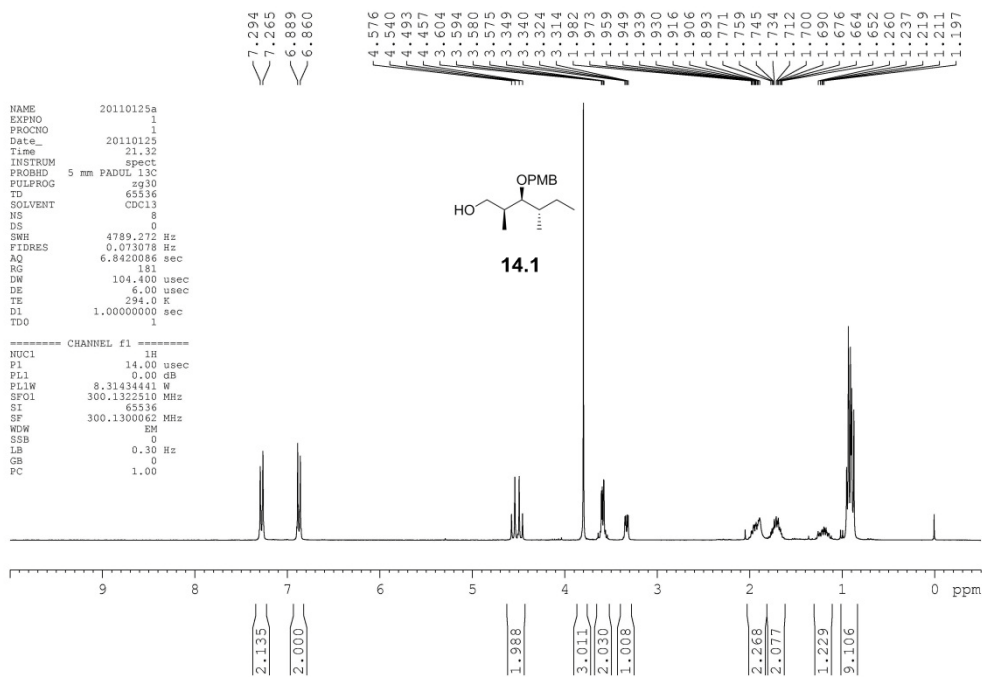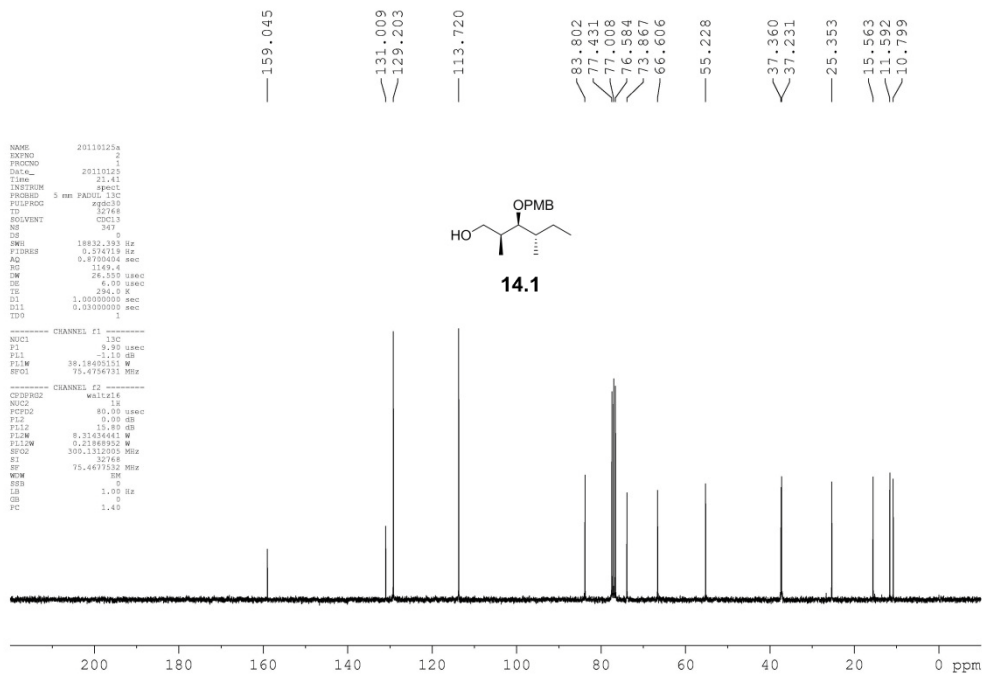

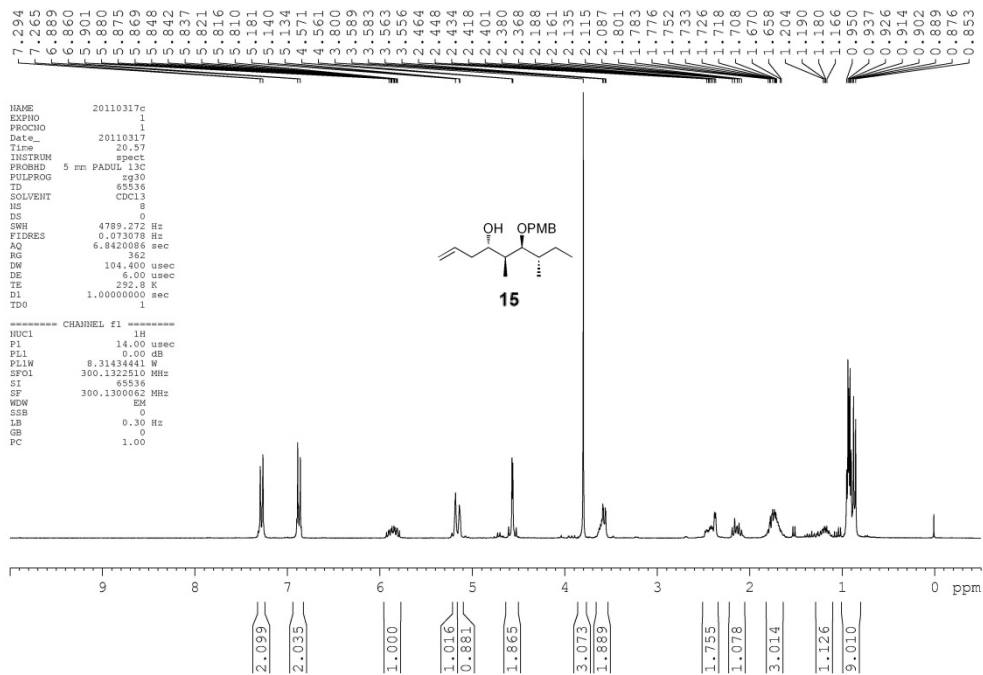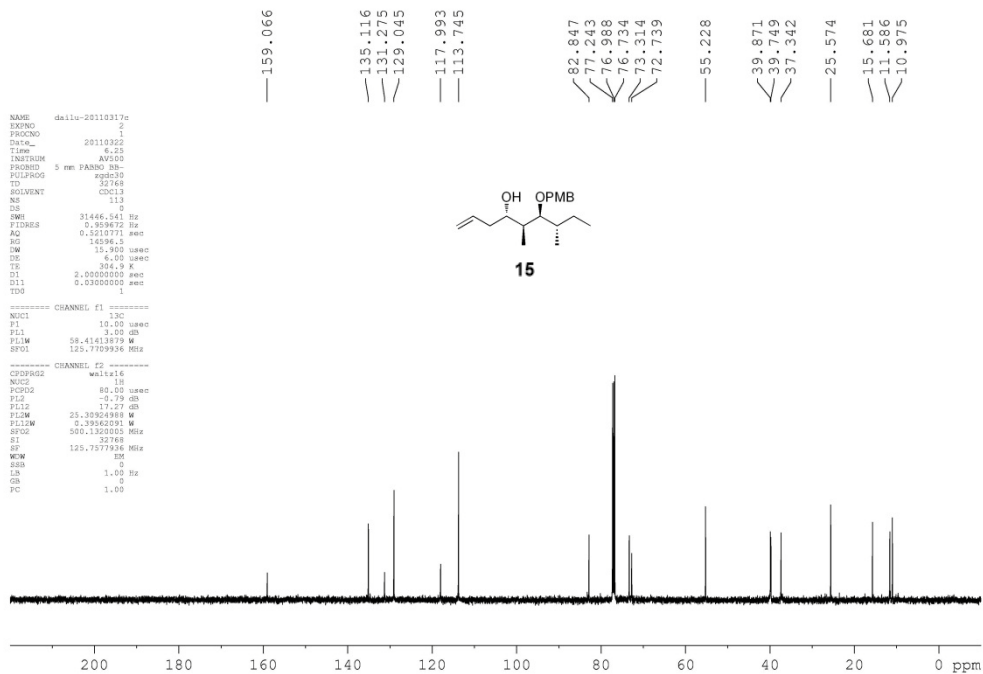

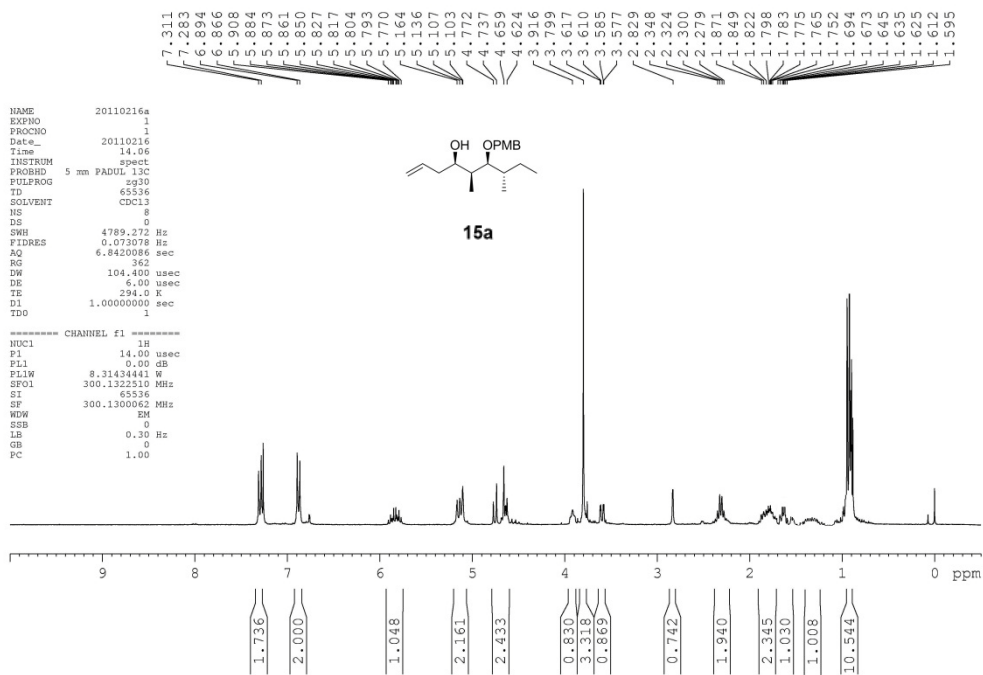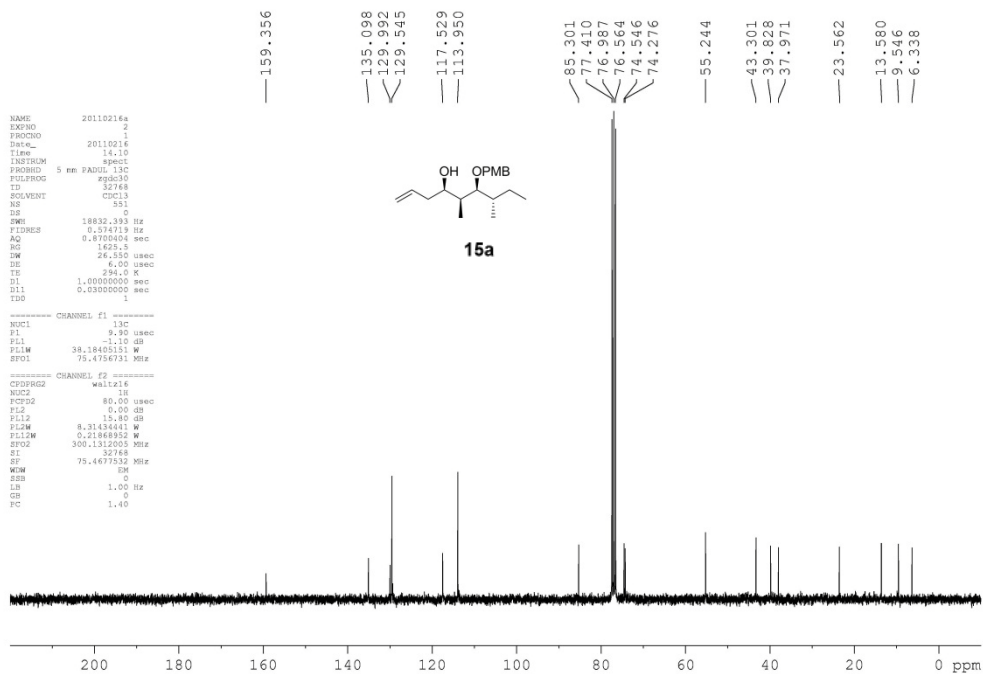







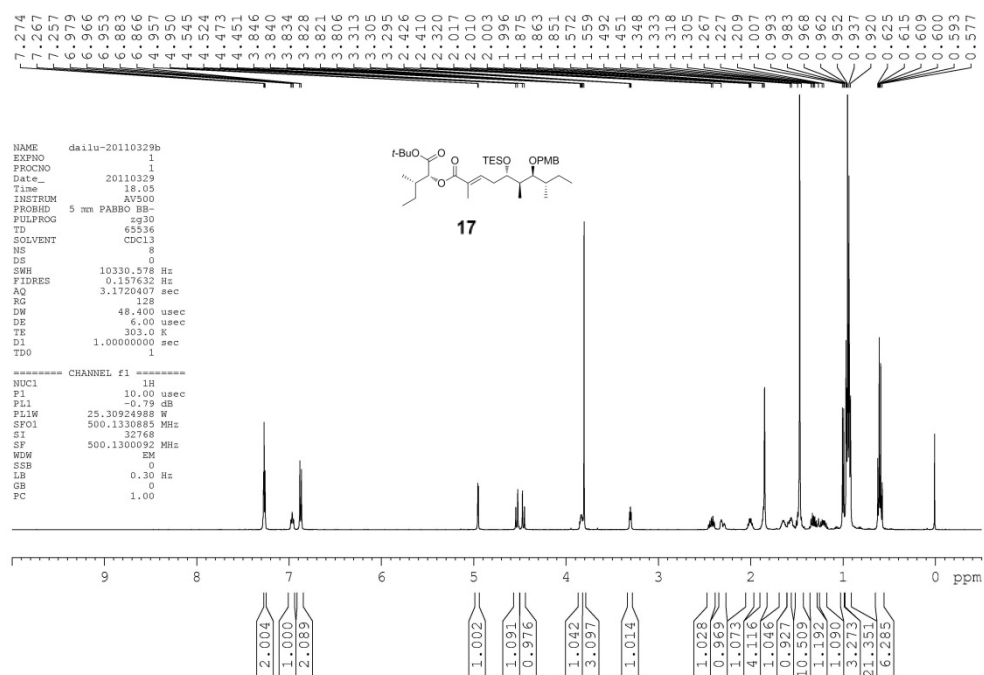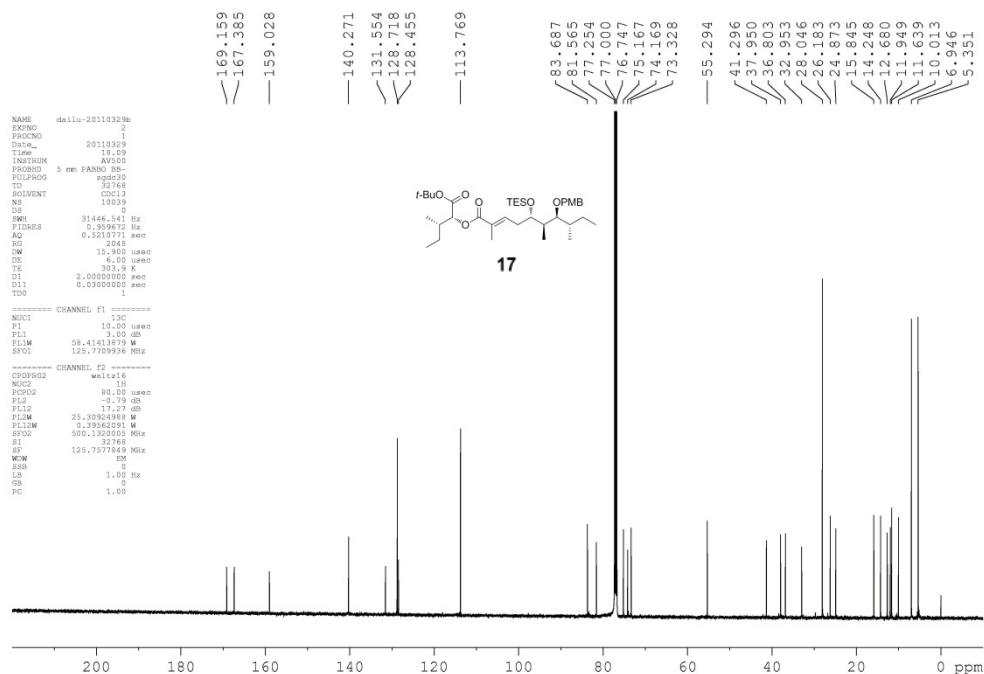

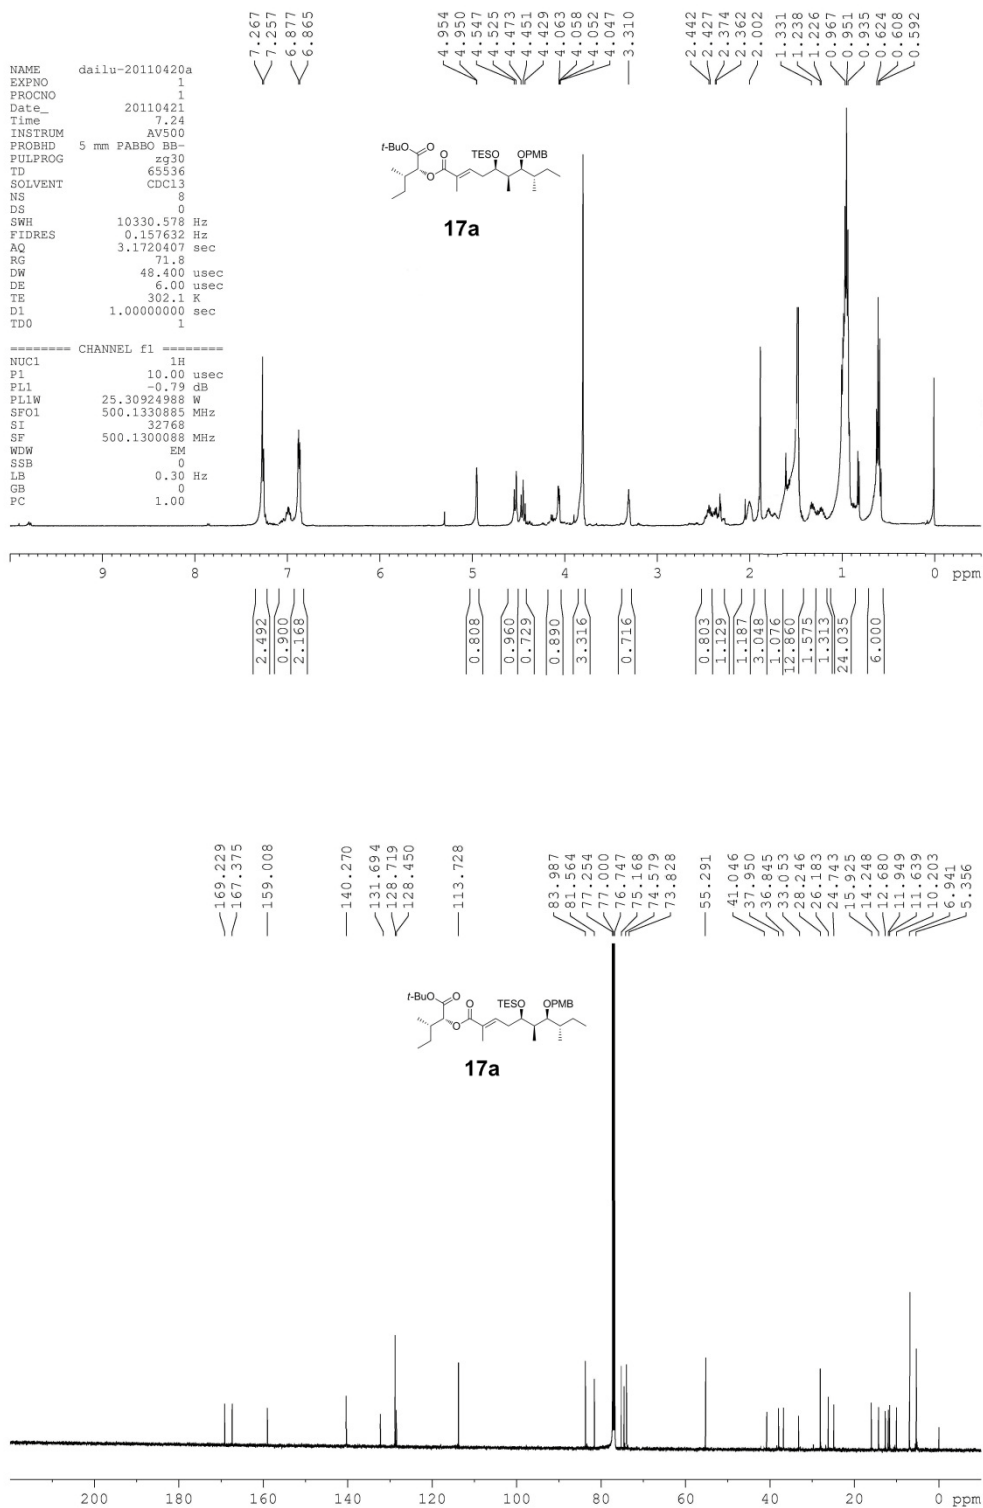

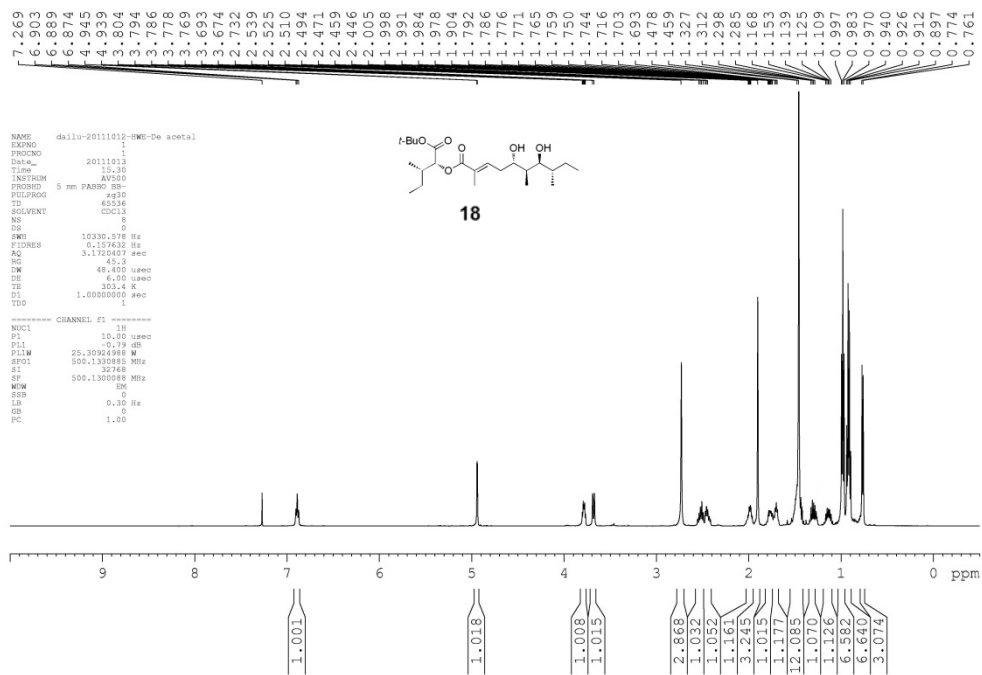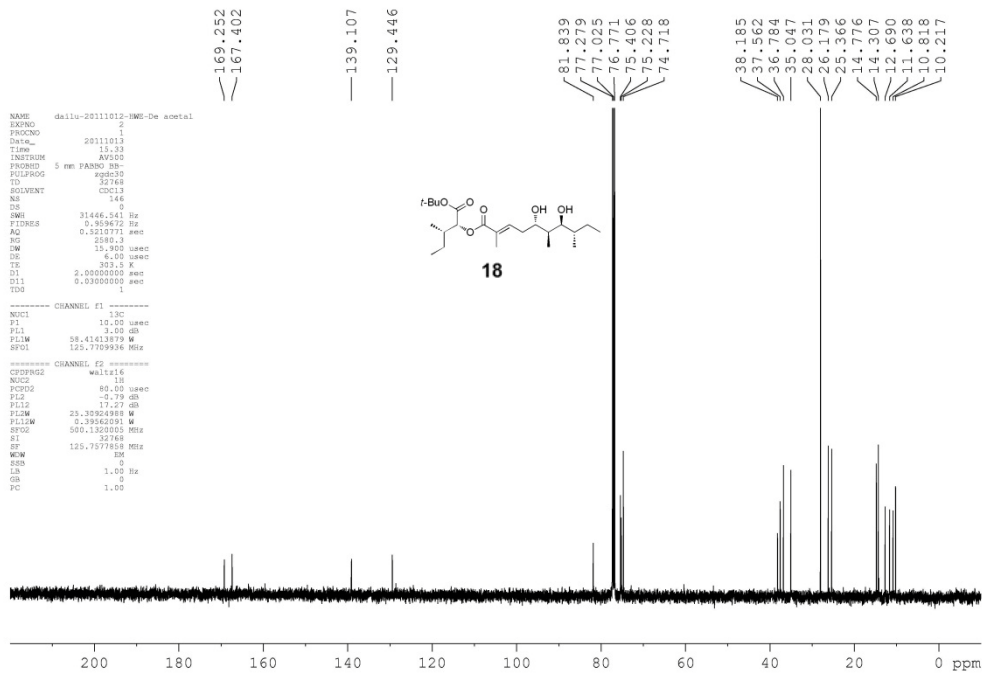

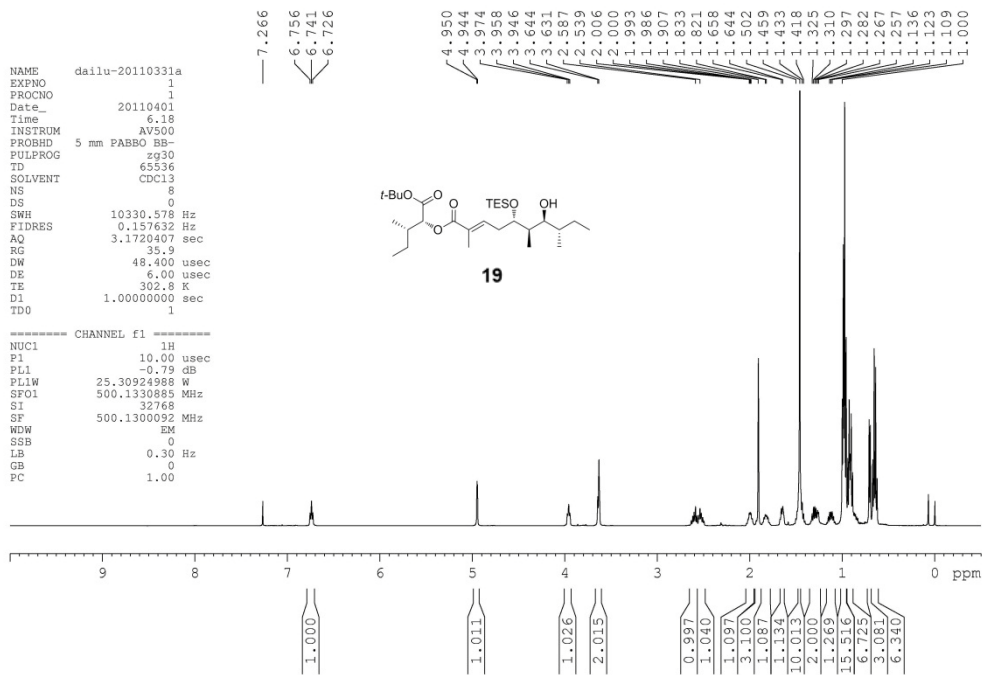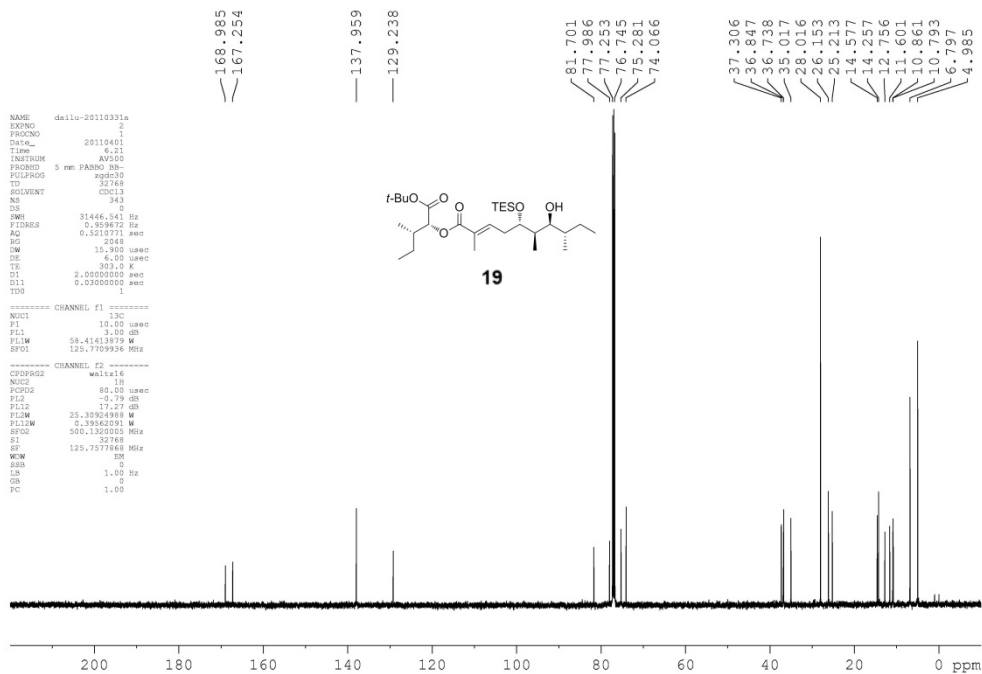

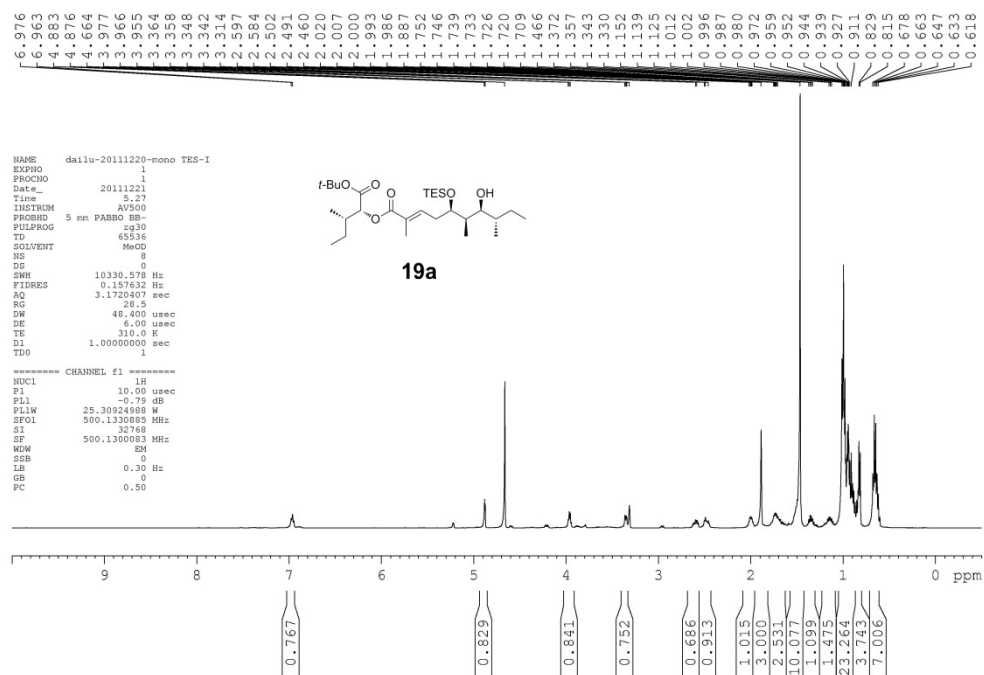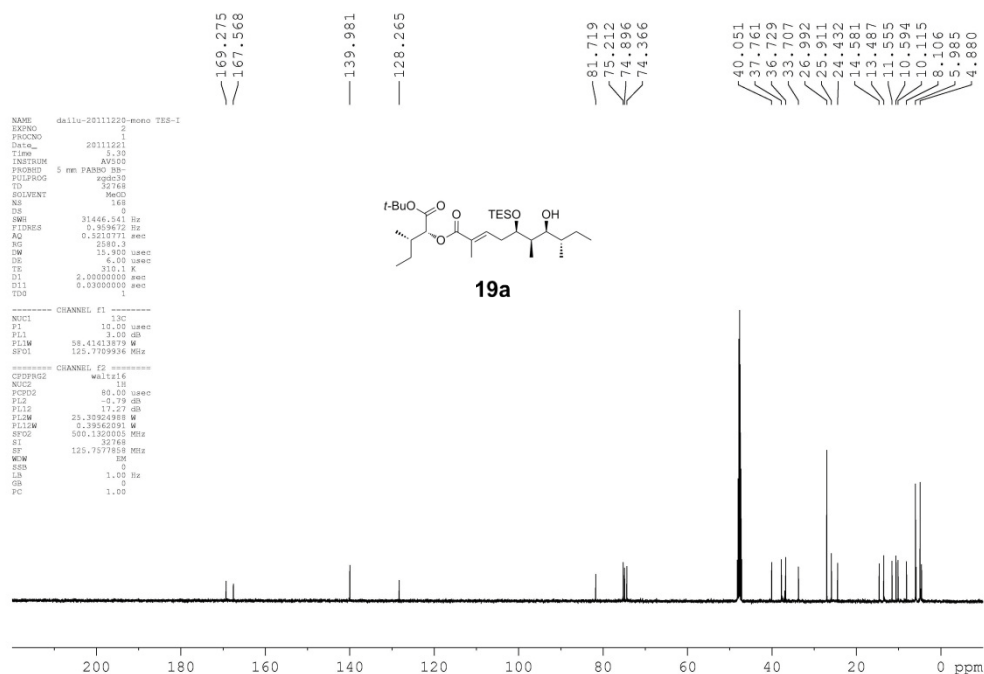

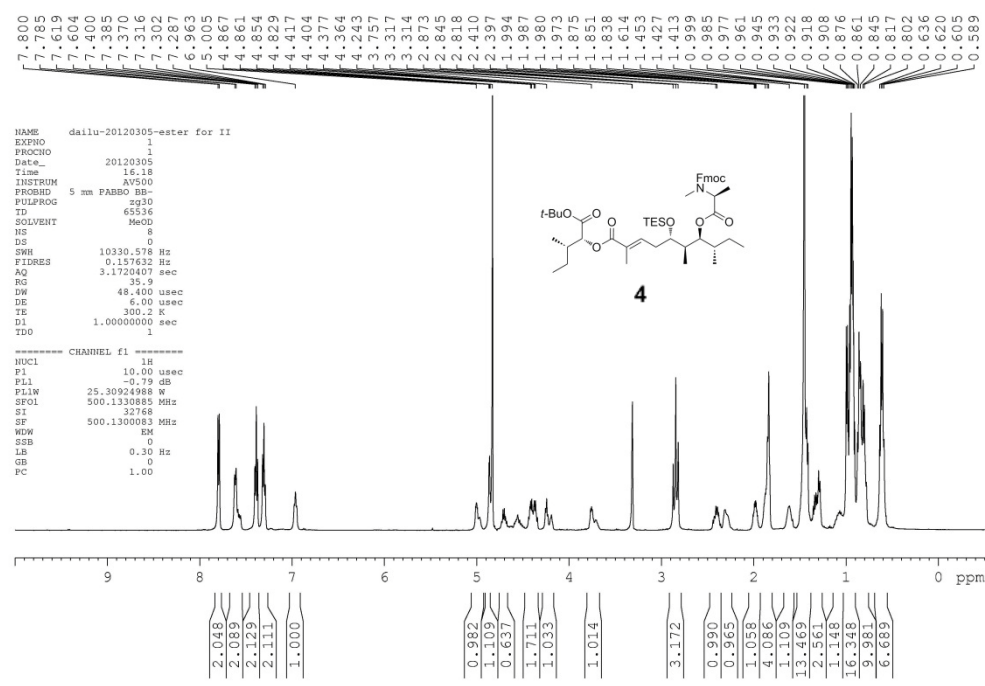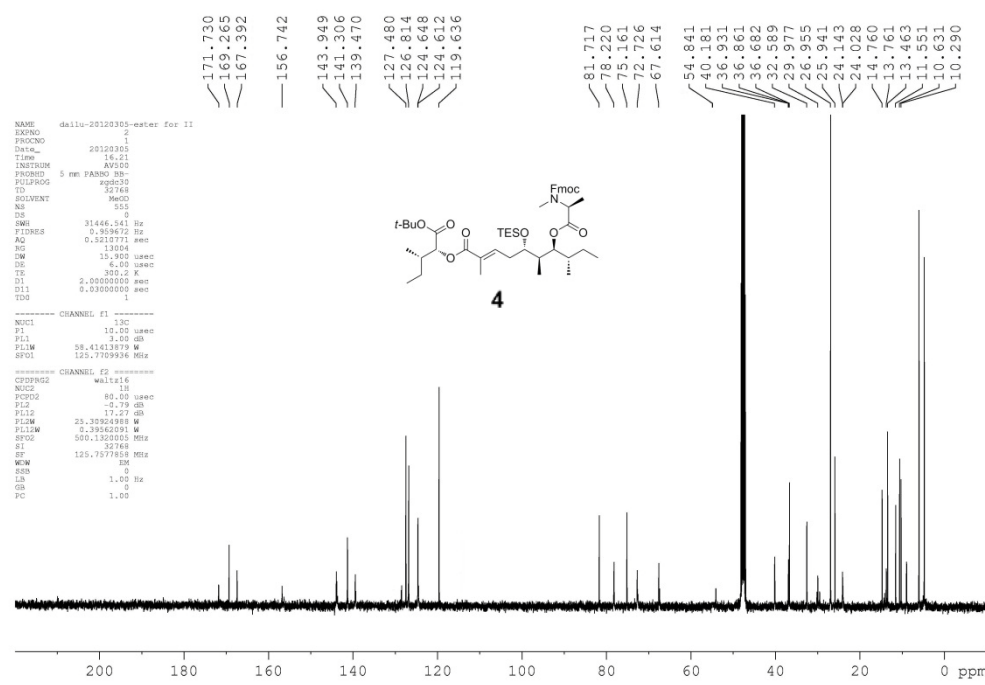



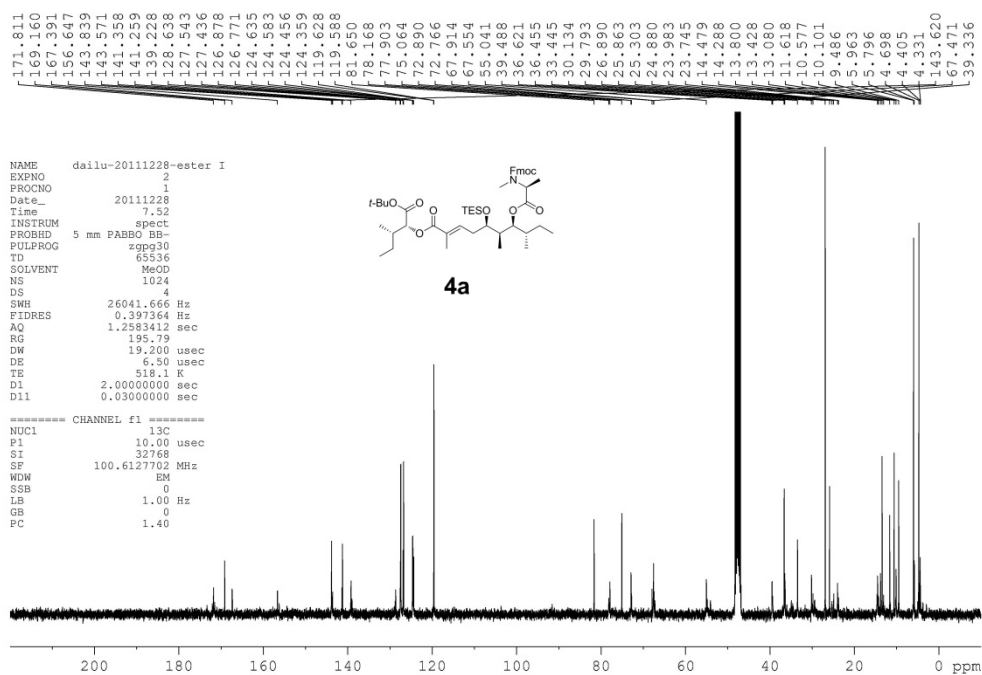

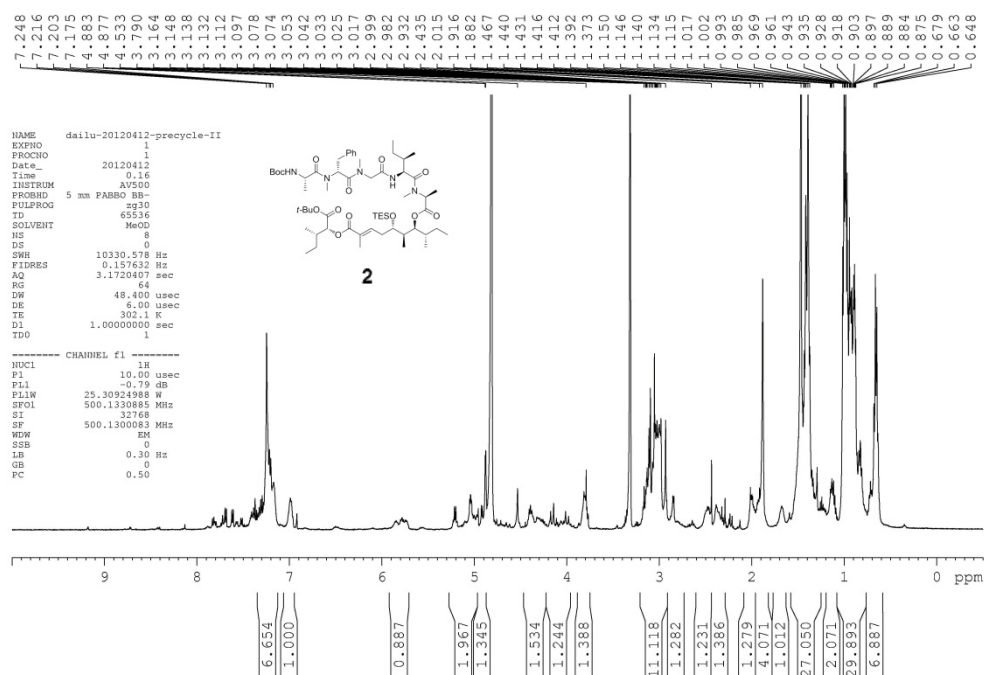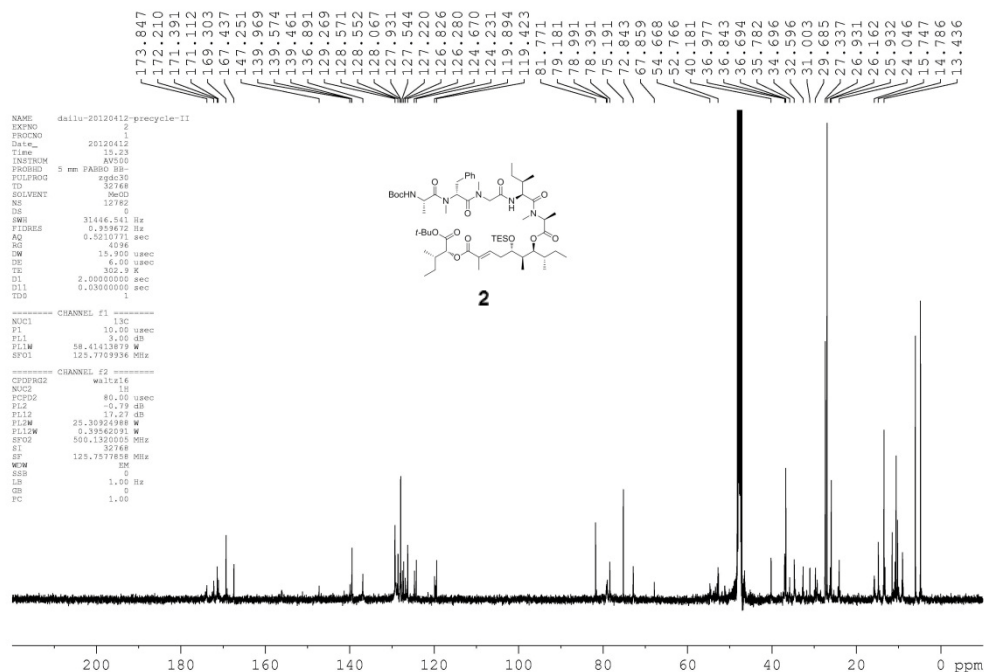

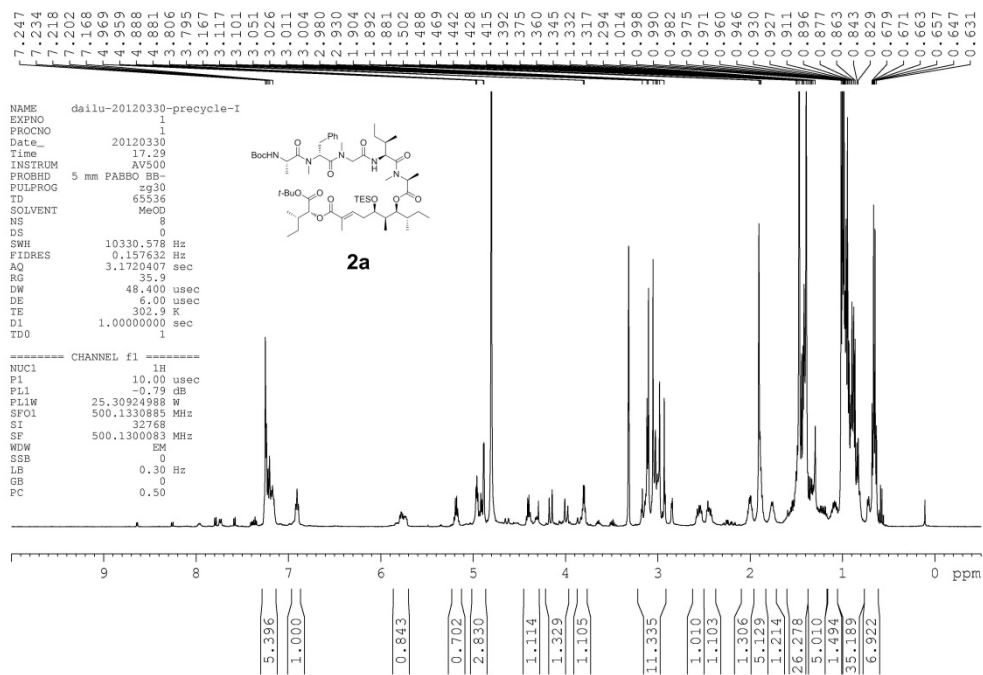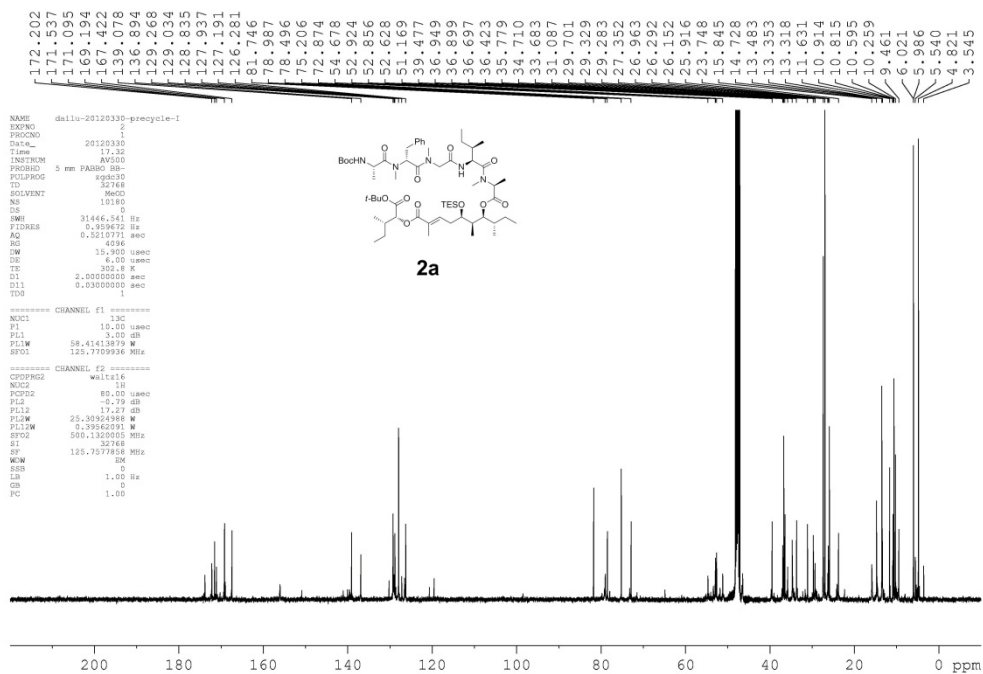

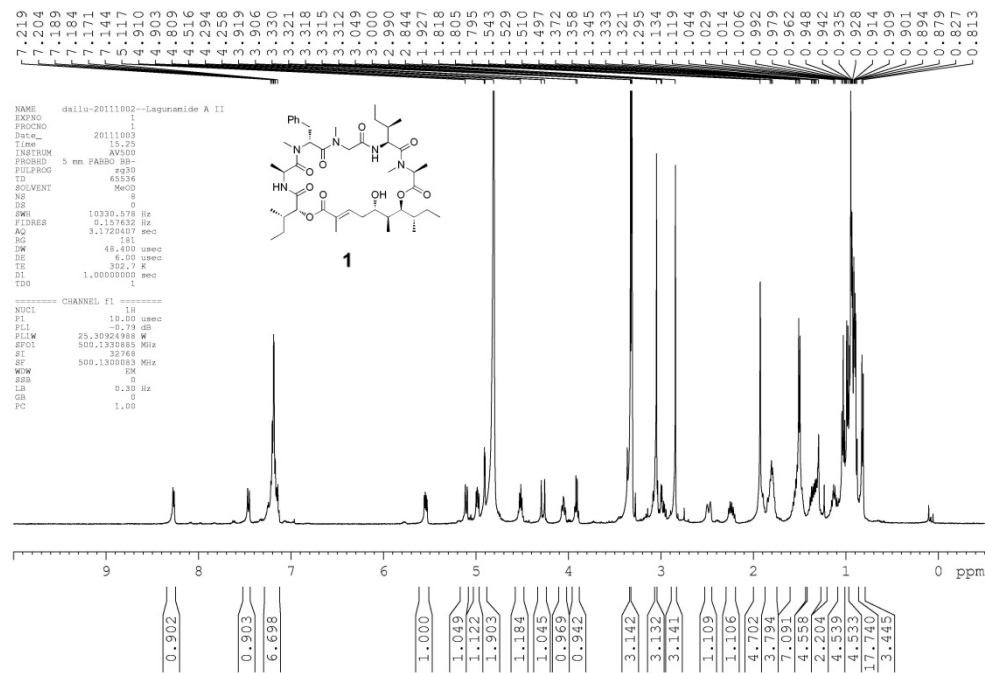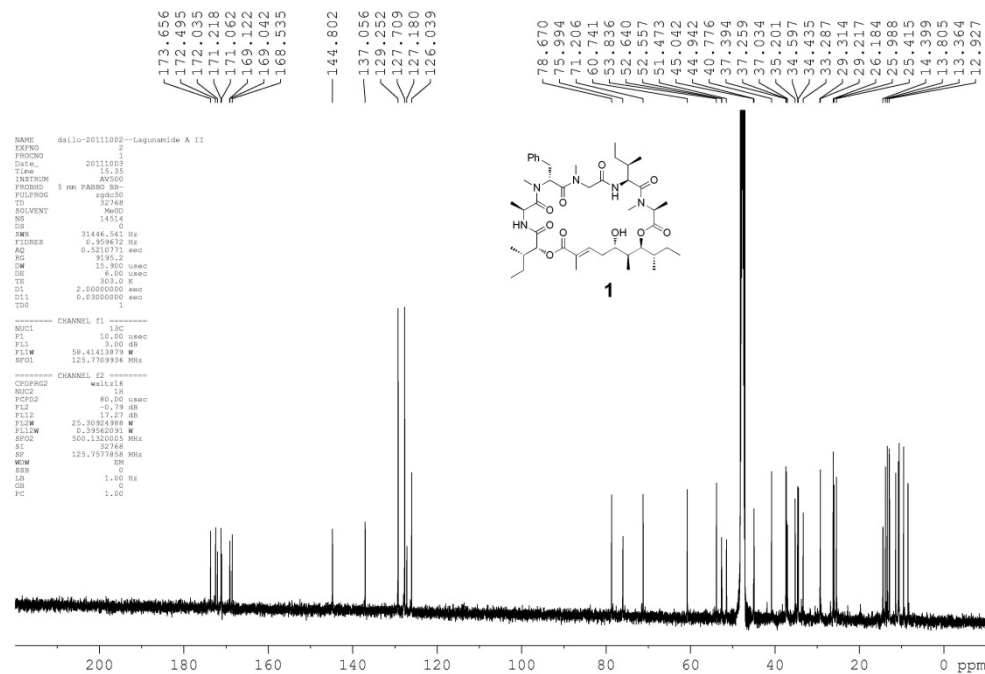

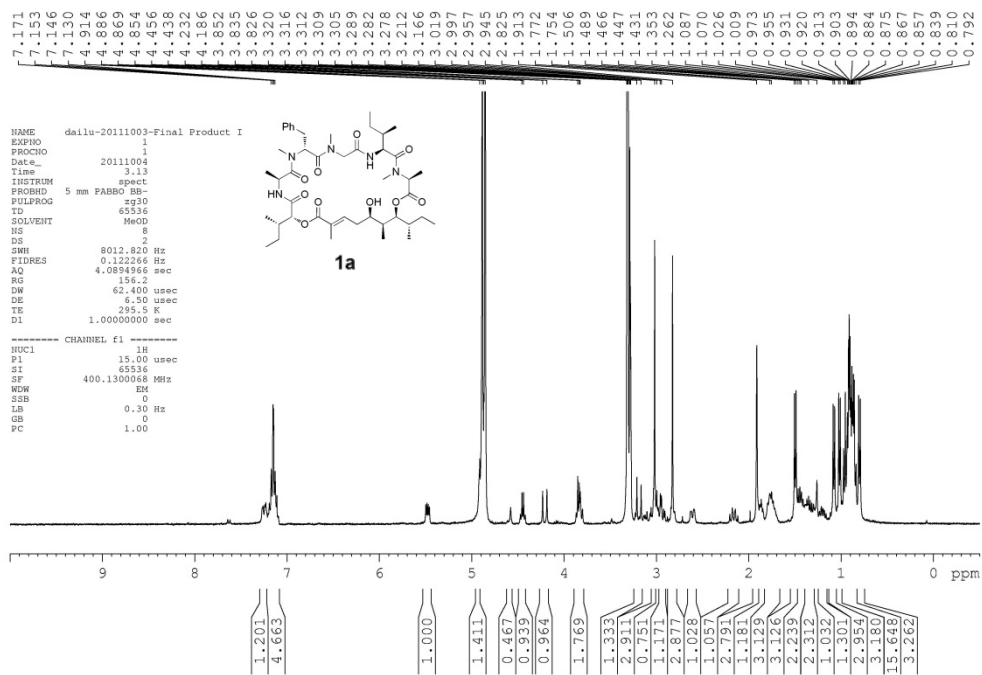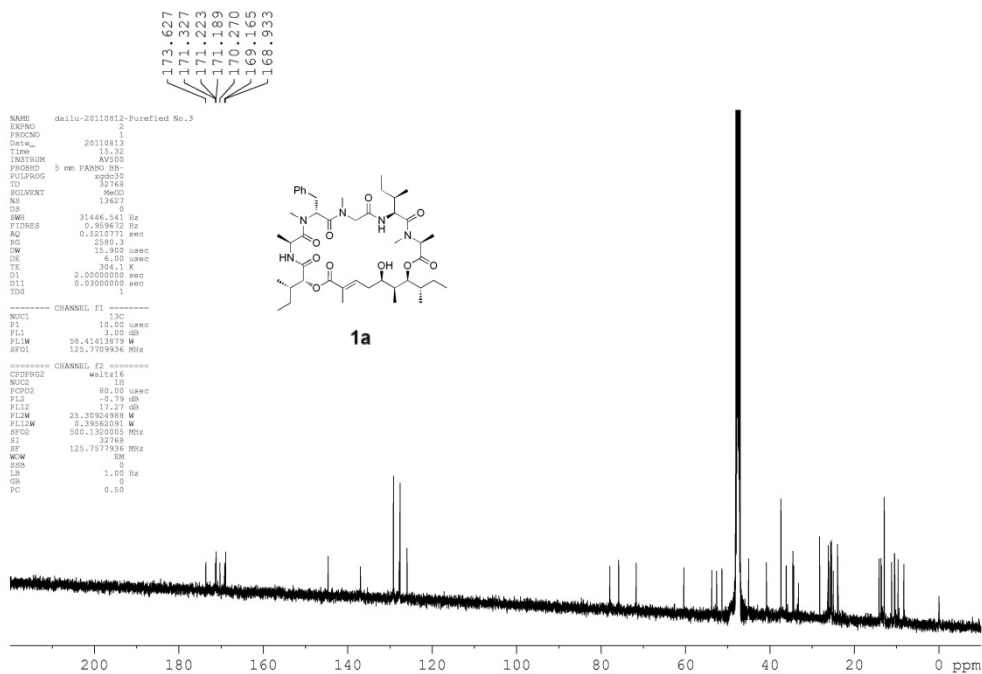

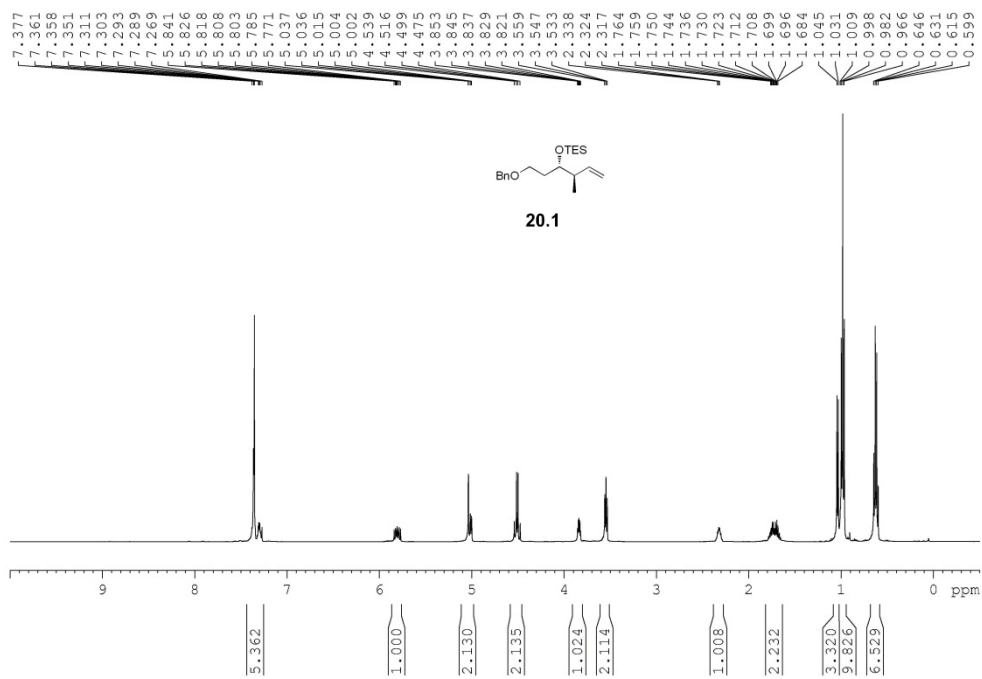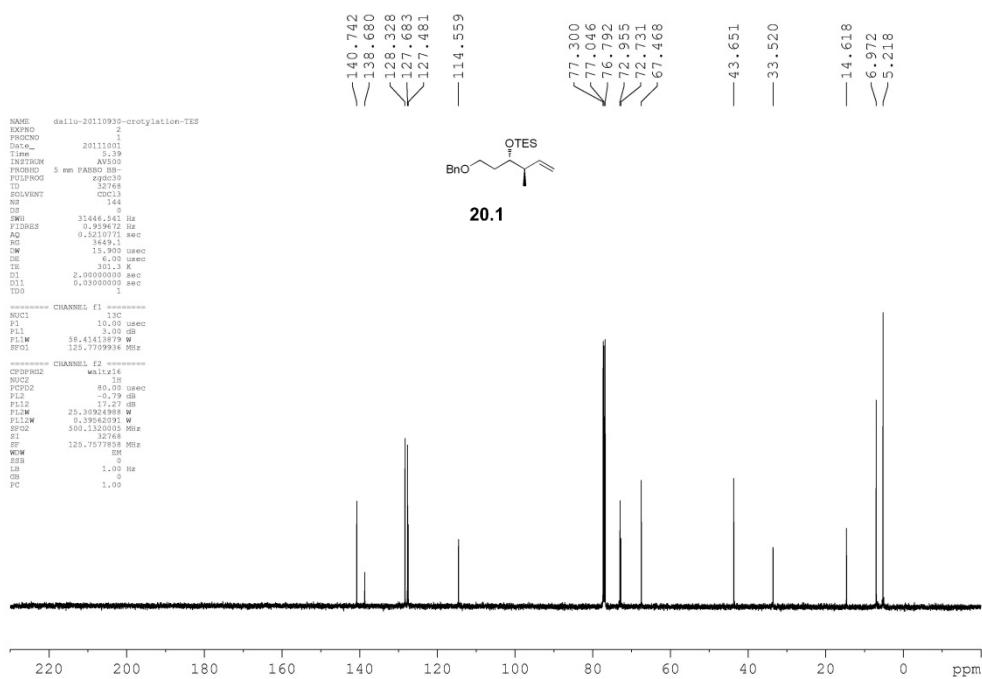

NAME: dailu-20110930-crotylation-T2E  
EXPNO: 2  
PROCNO: 1  
Date\_: 20111001  
Time: 0.39  
INSTRUM: AVX50  
PROBHD: 5 mm PABBO BB-  
PULPROG: zgpg30  
TD: 32768  
SOLVENT: CDCl3  
NS: 144  
DS: 0  
SWH: 31446.541 Hz  
F1REQ: 0.959612 Hz  
AQ: 0.5210771 sec  
RG: 344.1  
RW: 15.900 usec  
DE: 6.00 usec  
TE: 301.3 K  
D1: 2.00000000 sec  
D11: 0.03000000 sec  
TD0: 1

===== CHANNEL f1 =====  
NUC1: 13C  
P1: 10.00 usec  
PL1: 3.00 dB  
PL1W: 58.4343879 W  
SFO1: 125.7709934 MHz

===== CHANNEL f2 =====  
CPDPRG2: waltz16  
NUC2: 1H  
PCPD2: 40.00 usec  
PL2: -0.79 dB  
PL12: 17.27 dB  
PL2W: 25.33924988 W  
PL1W: 0.3952021 W  
SFO2: 500.1320053 MHz  
S1: 2748  
SF: 125.7577858 MHz  
MCW: 0  
SSB: 0  
LB: 1.00 Hz  
GB: 0  
PC: 1.00

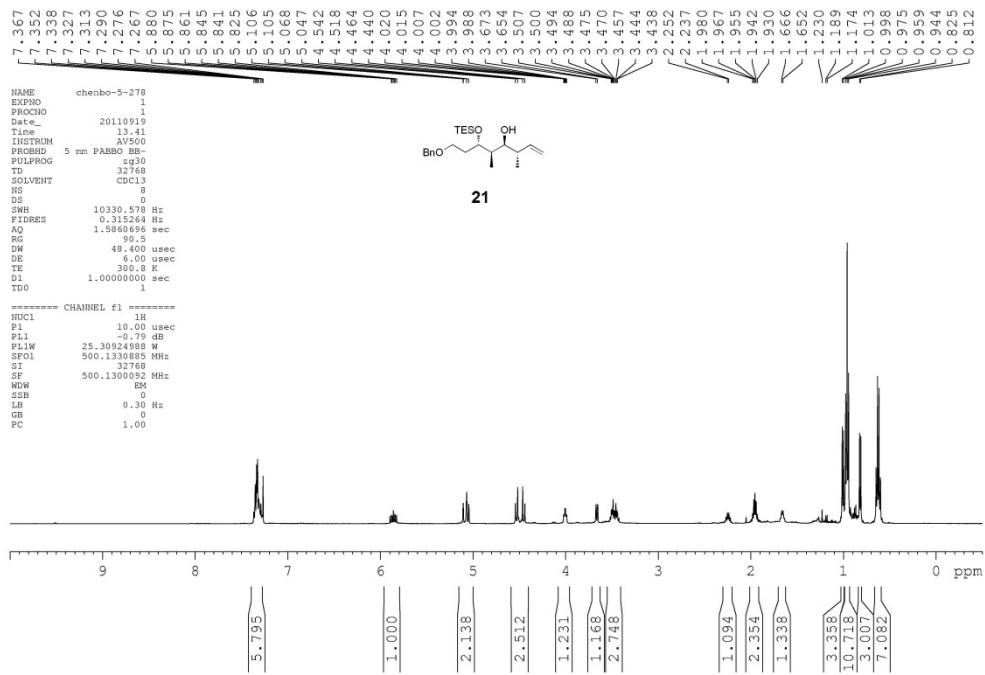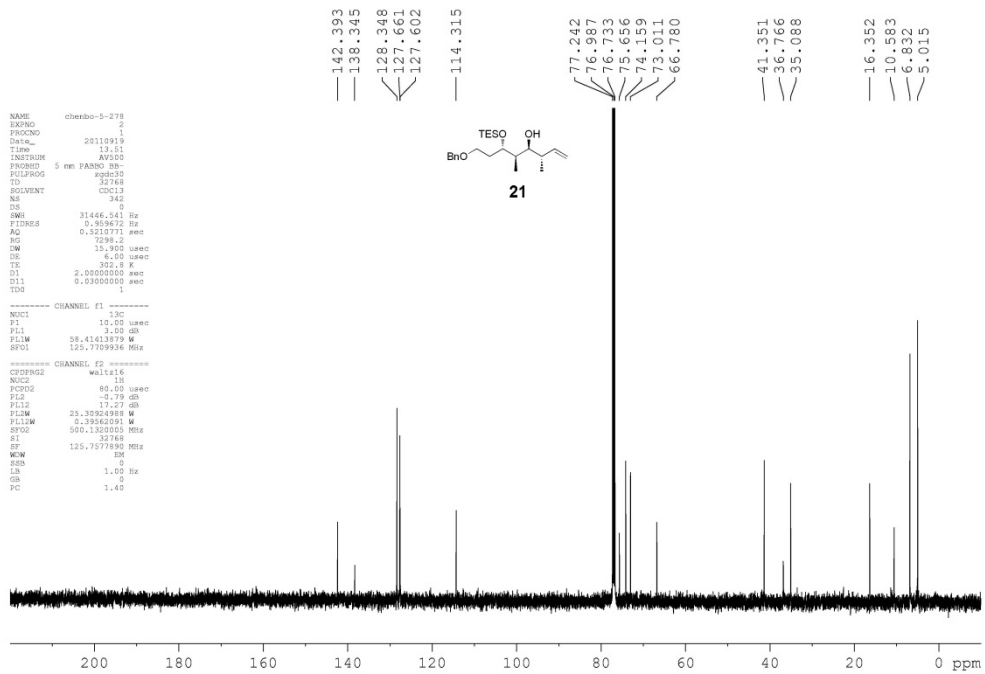



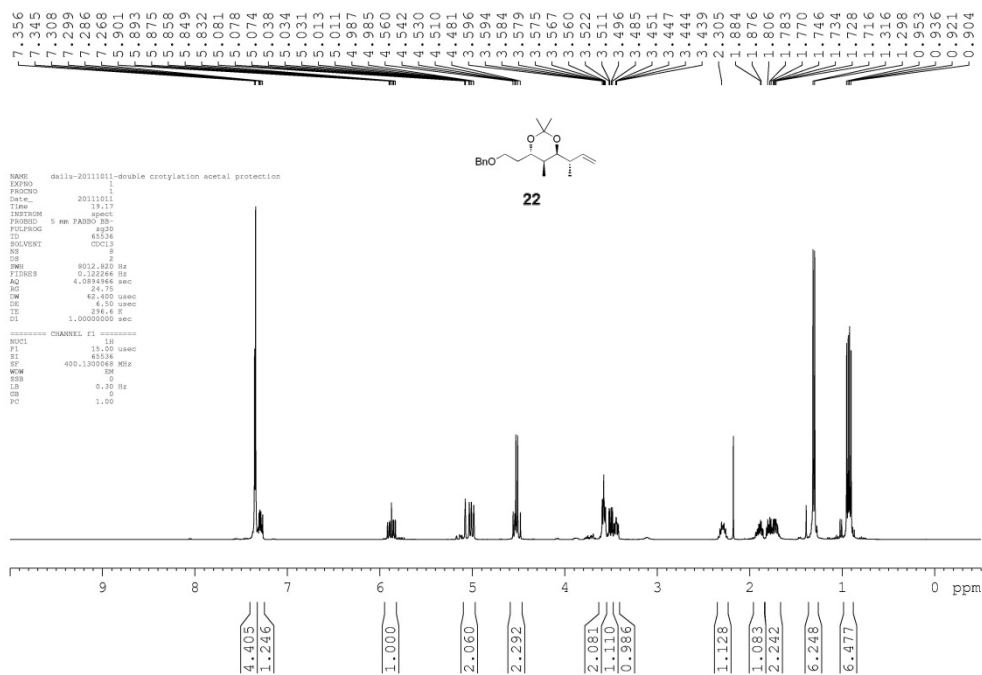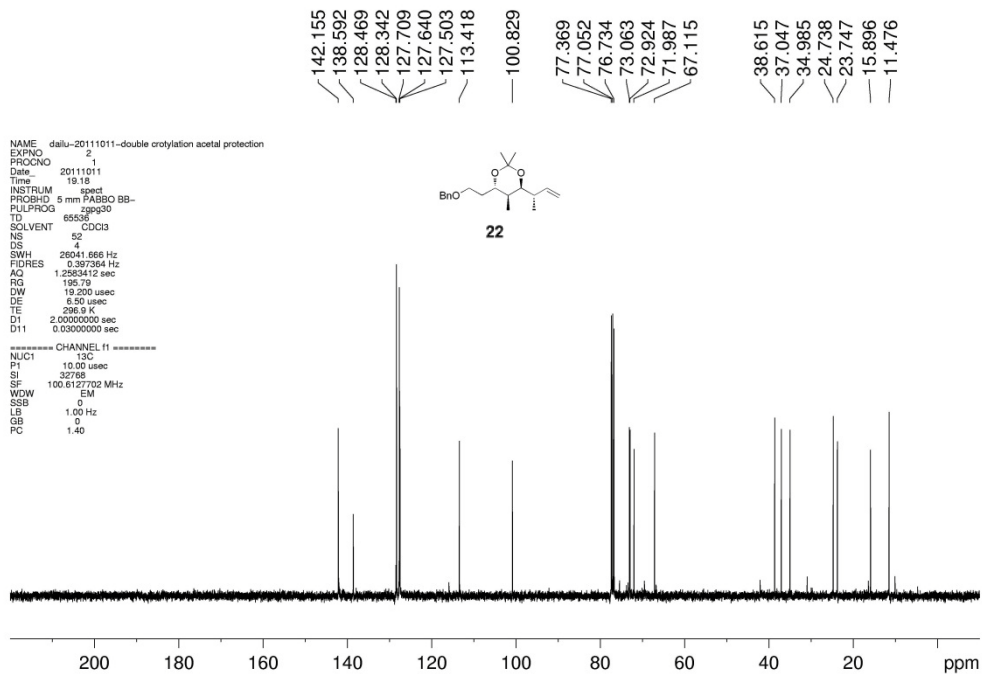



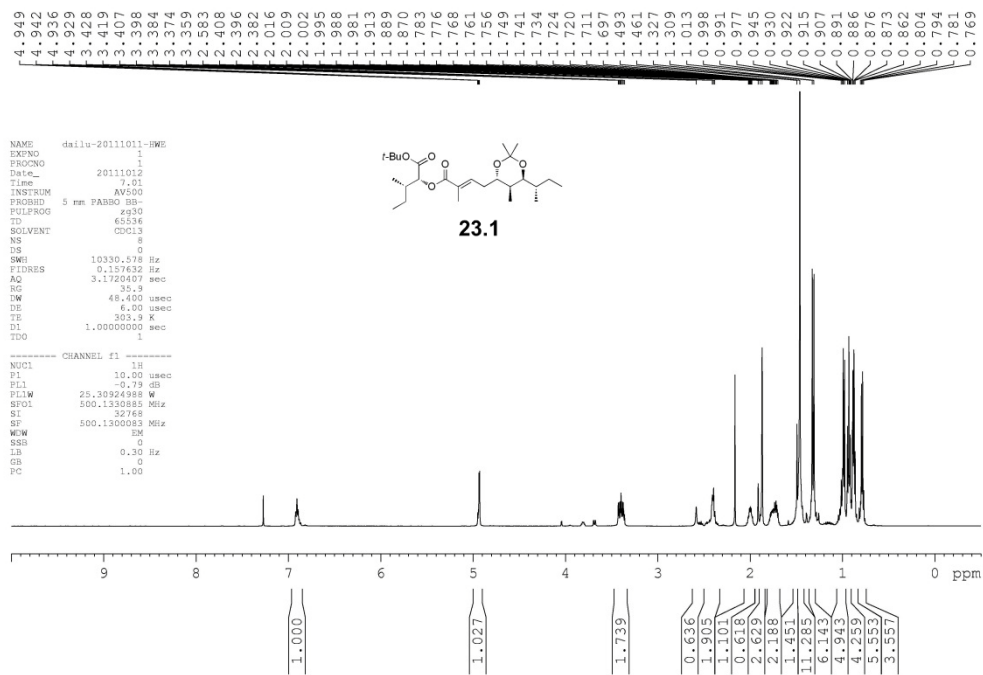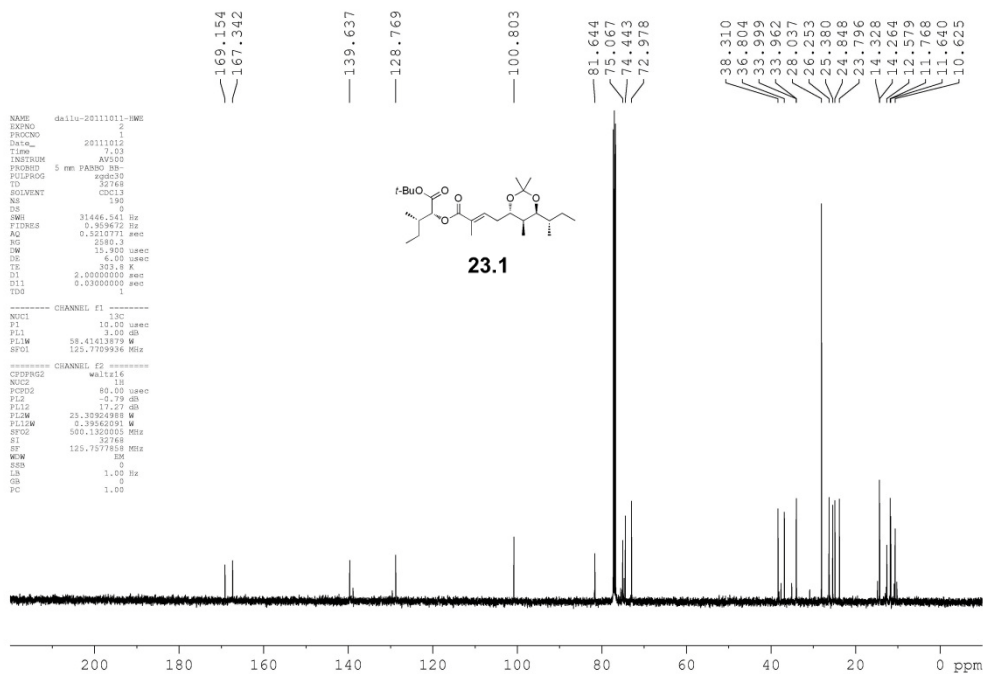

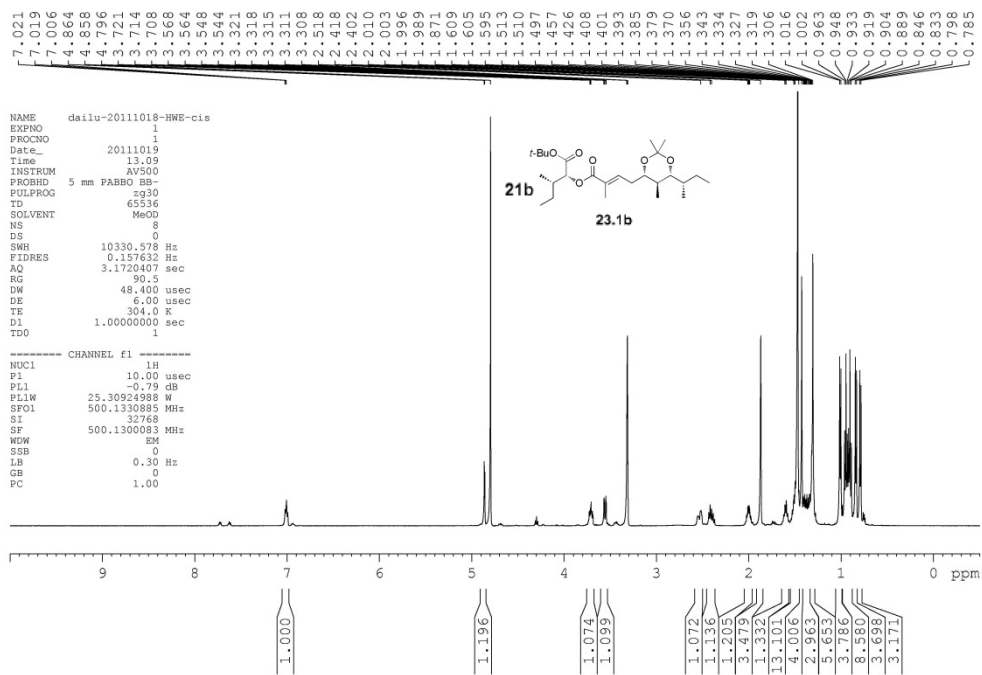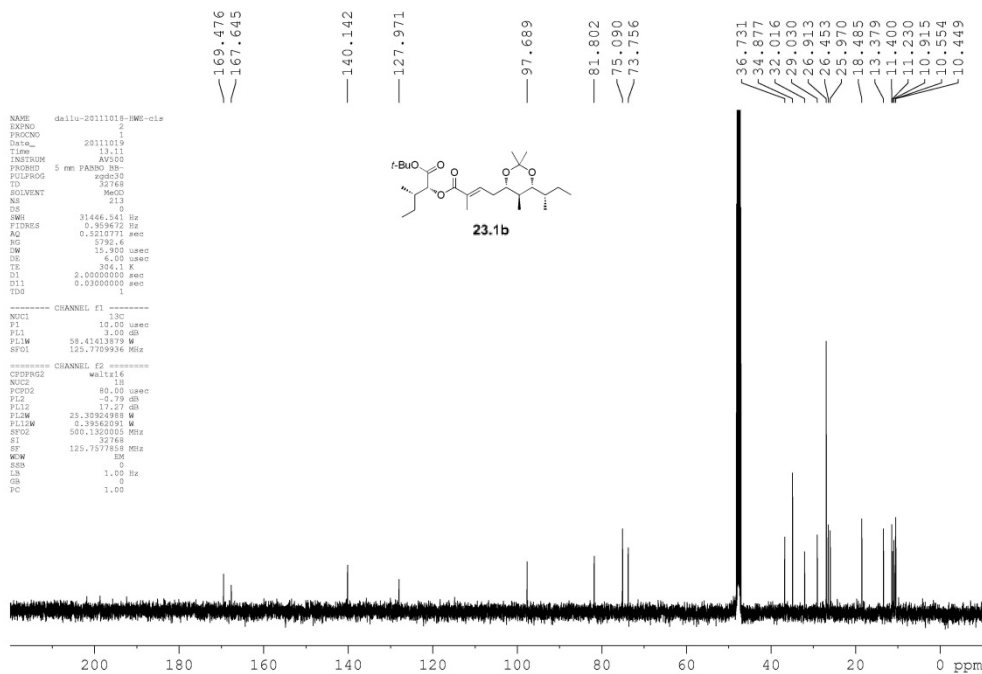

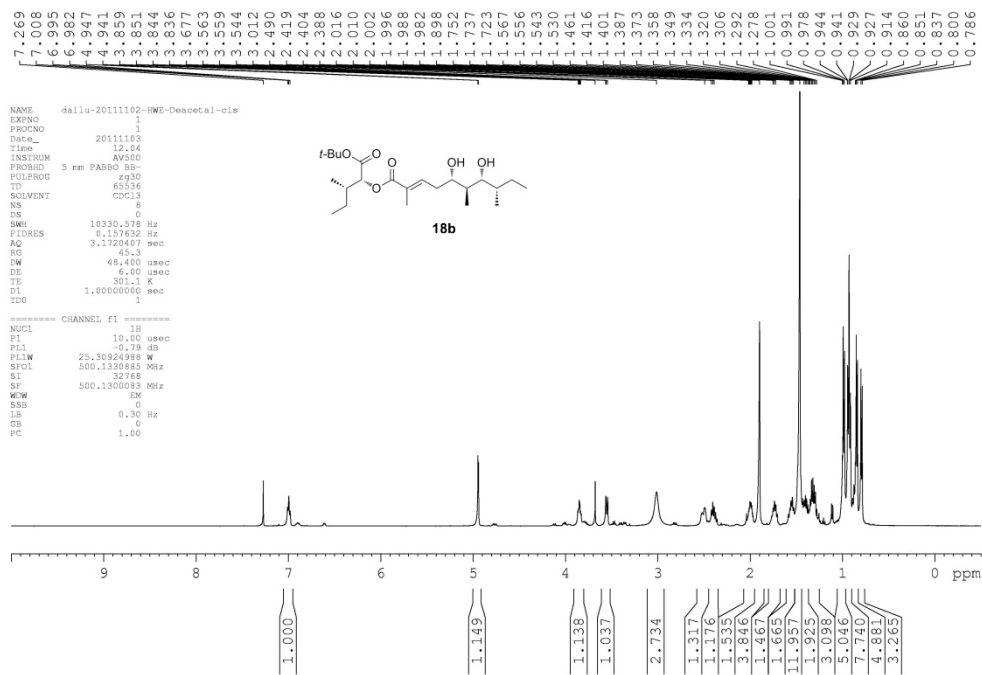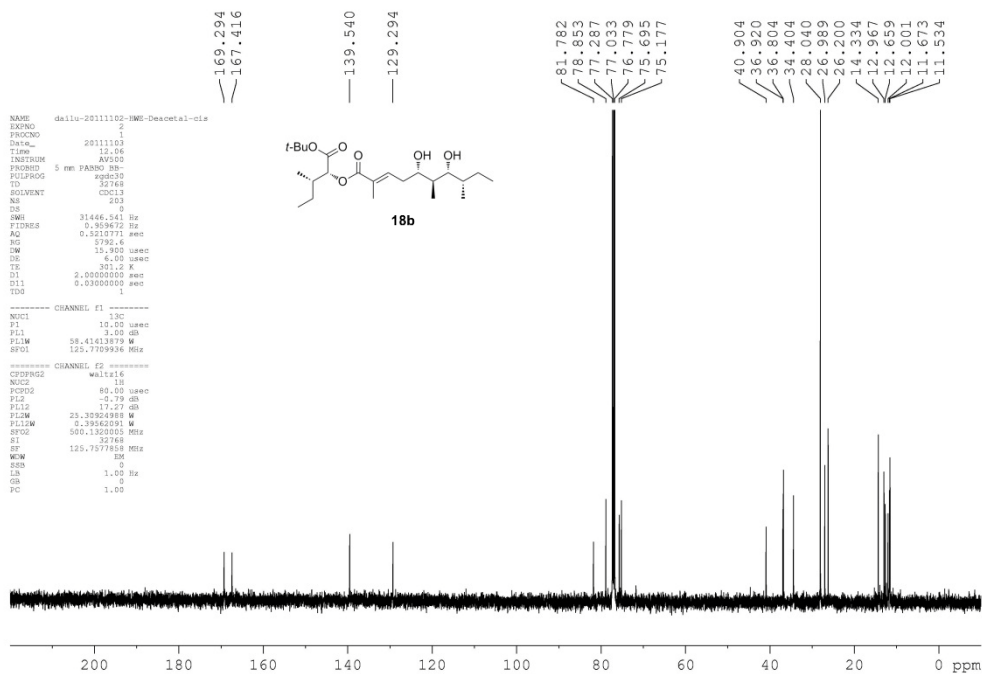

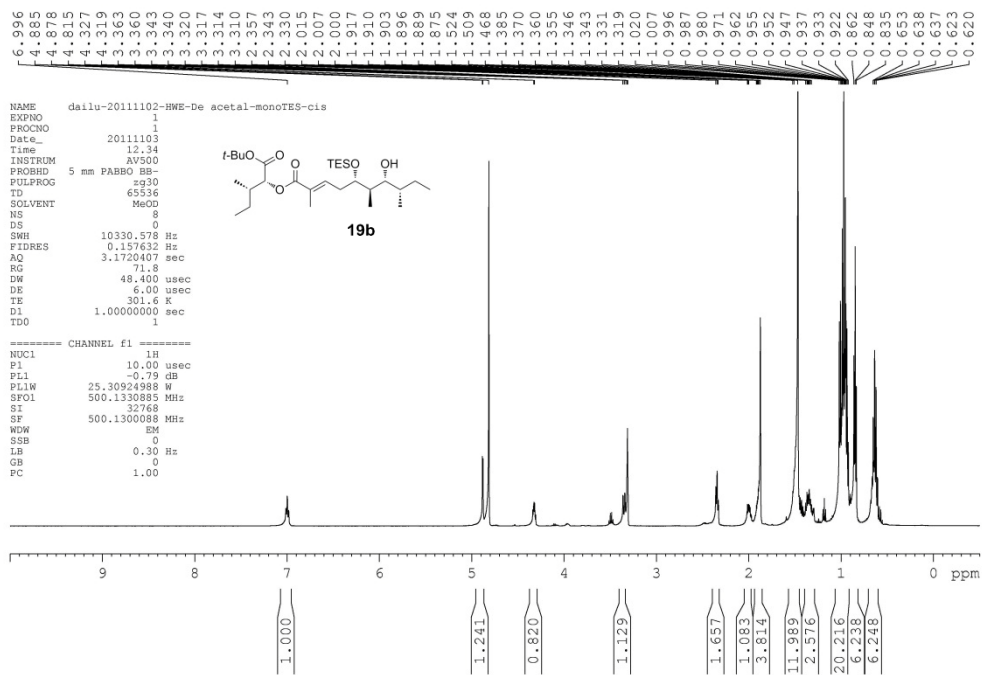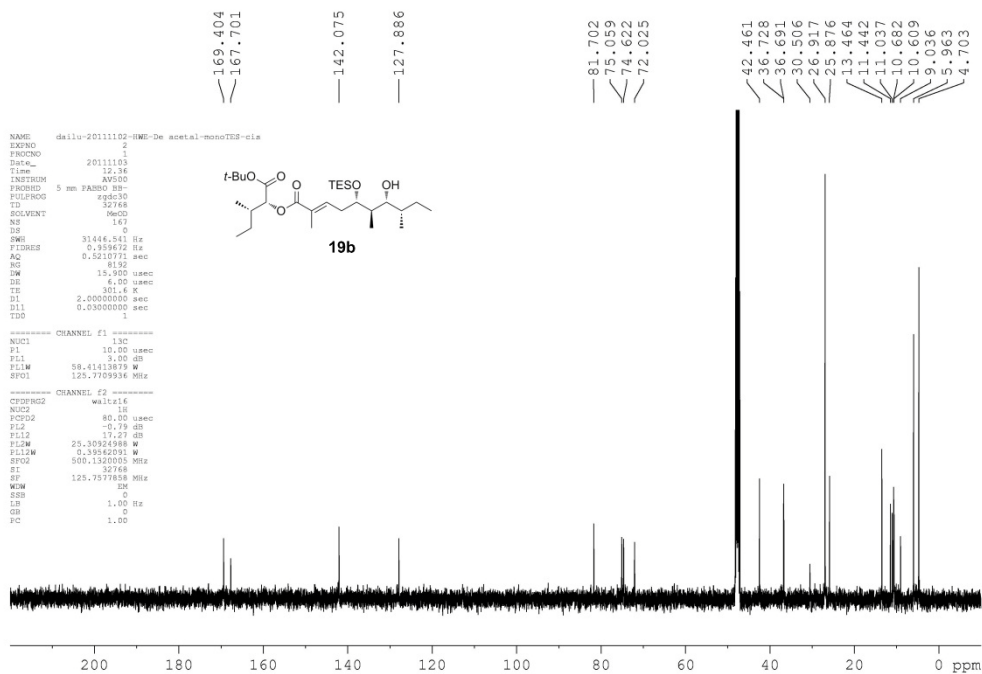

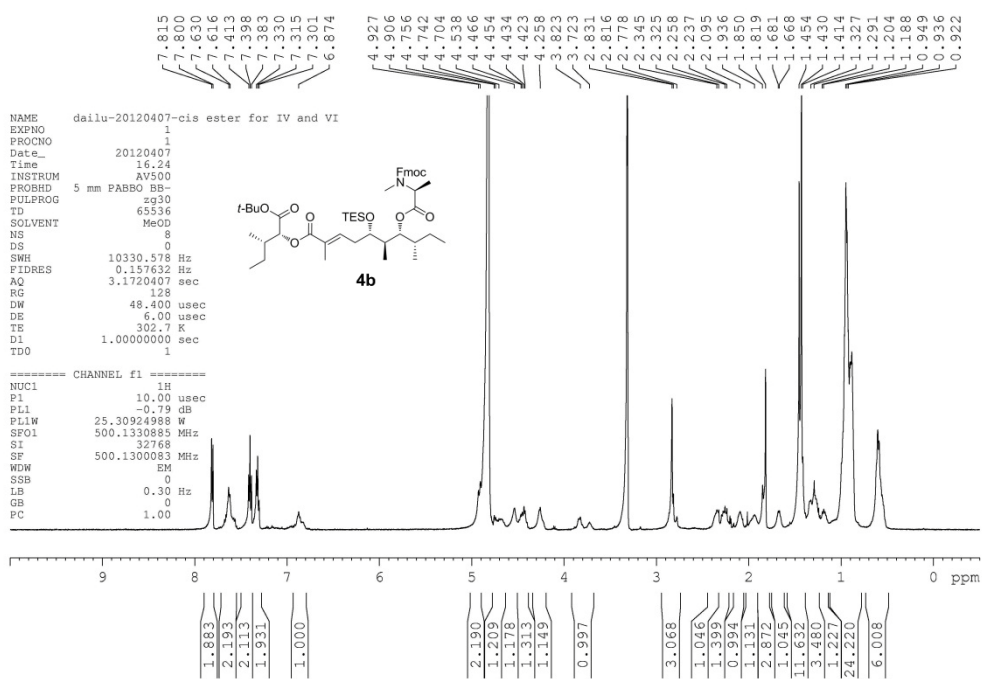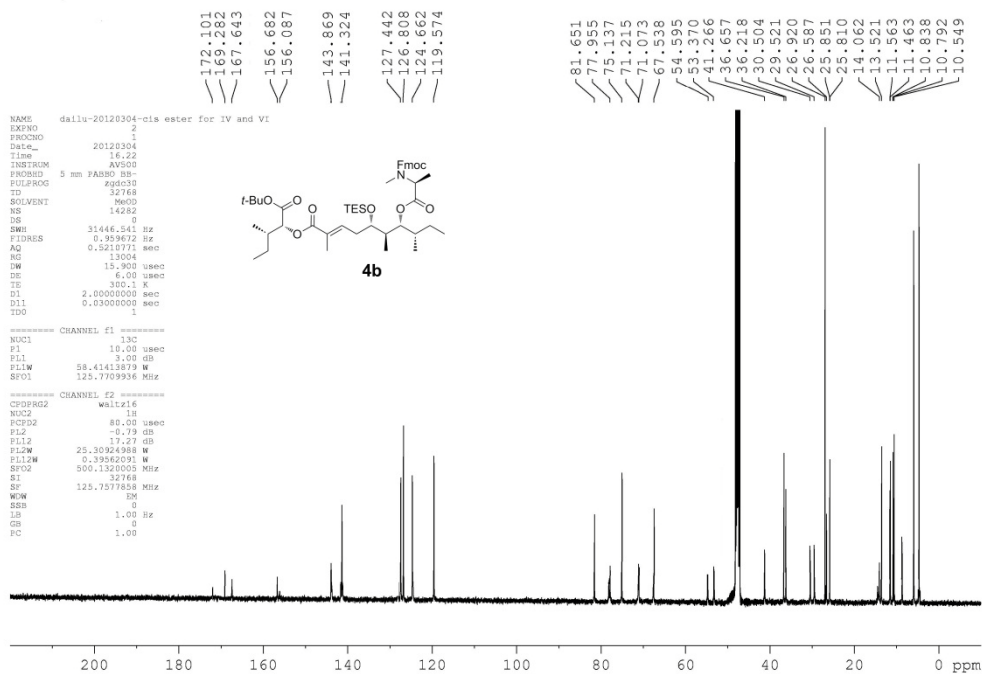

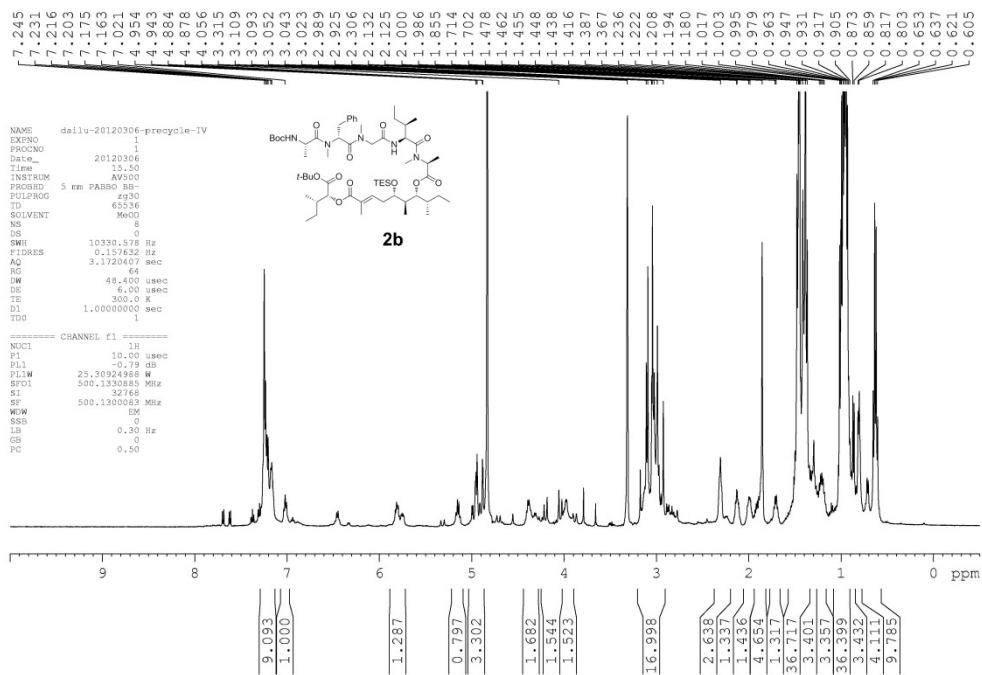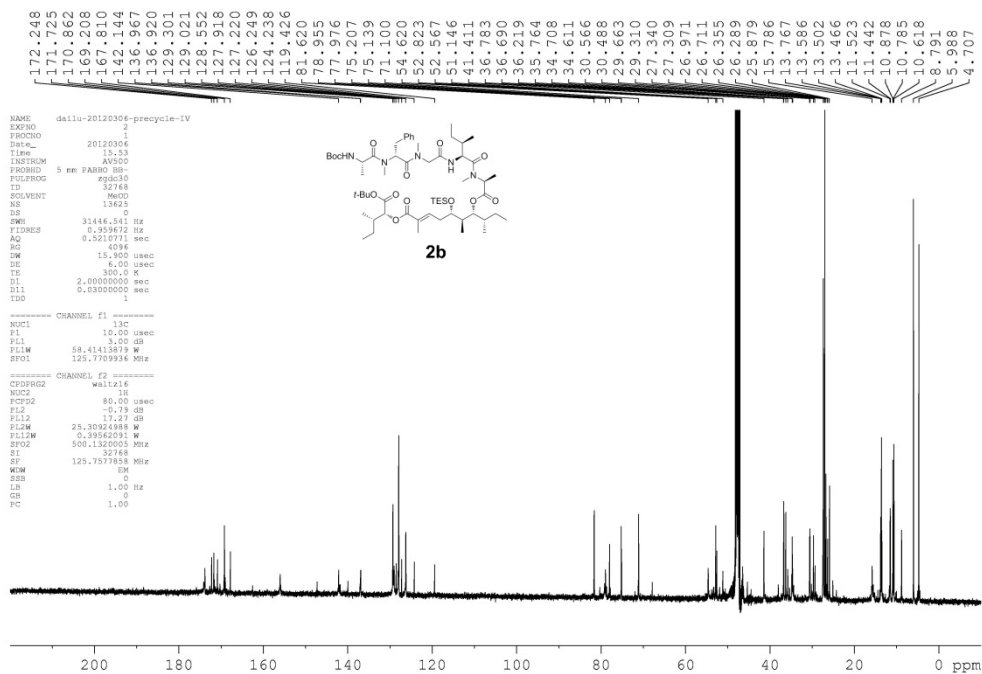

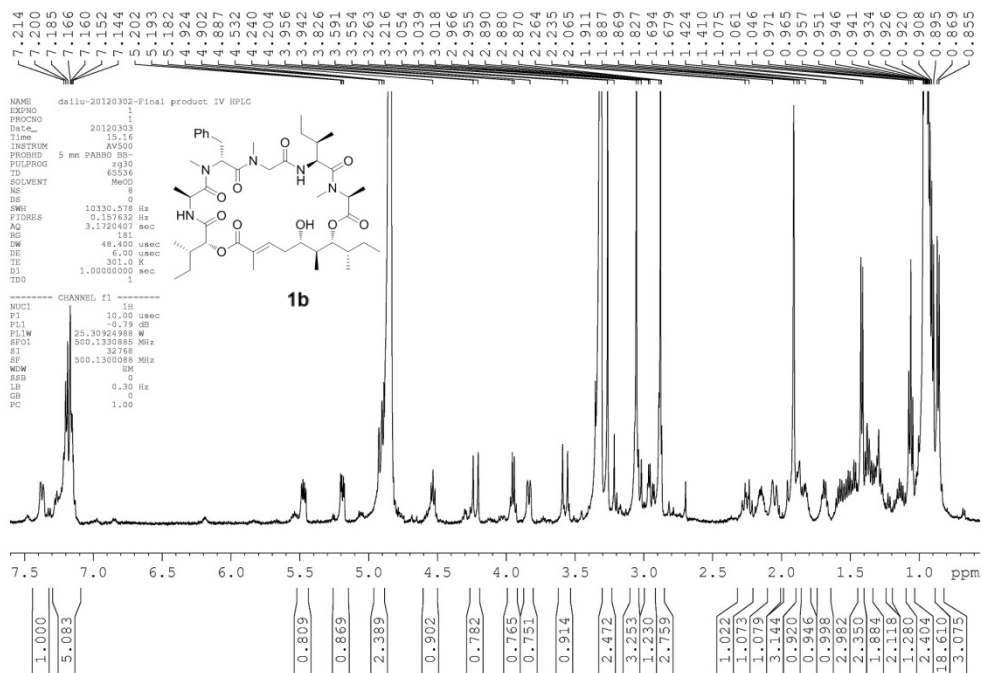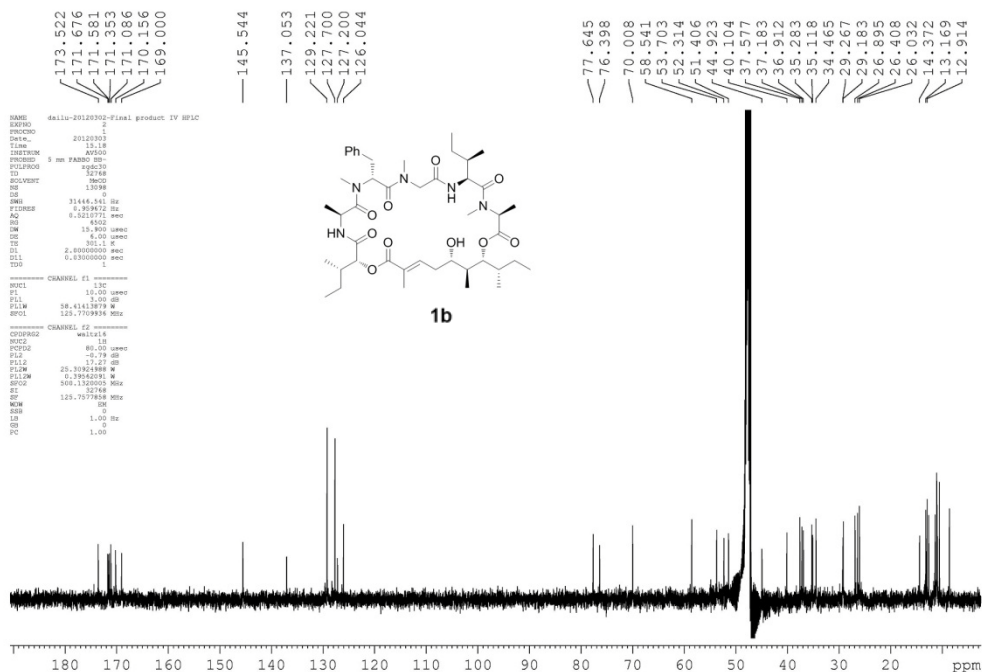



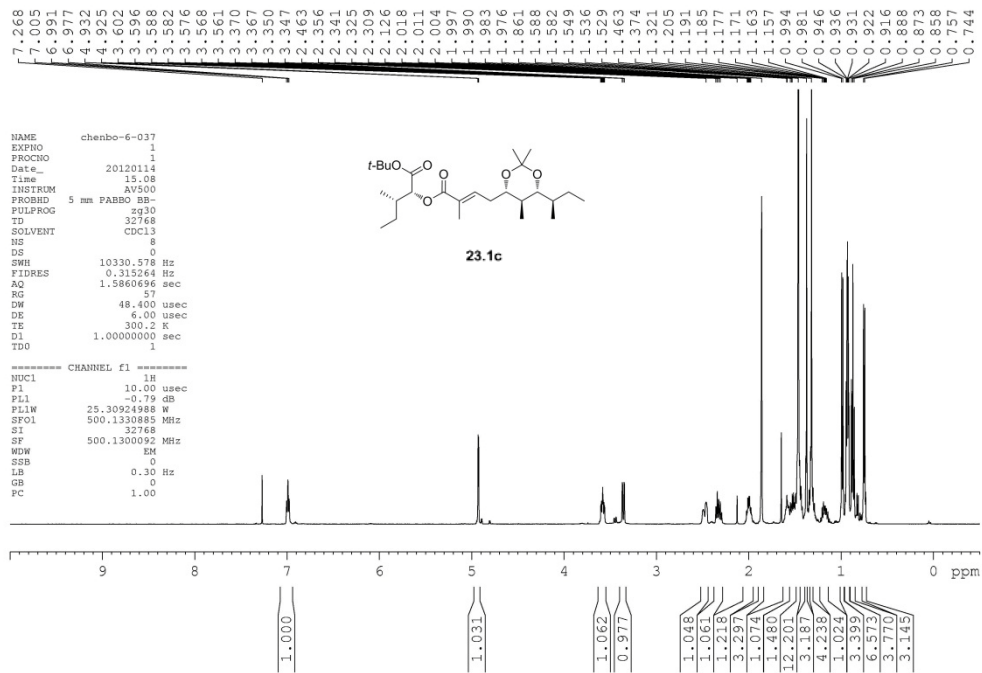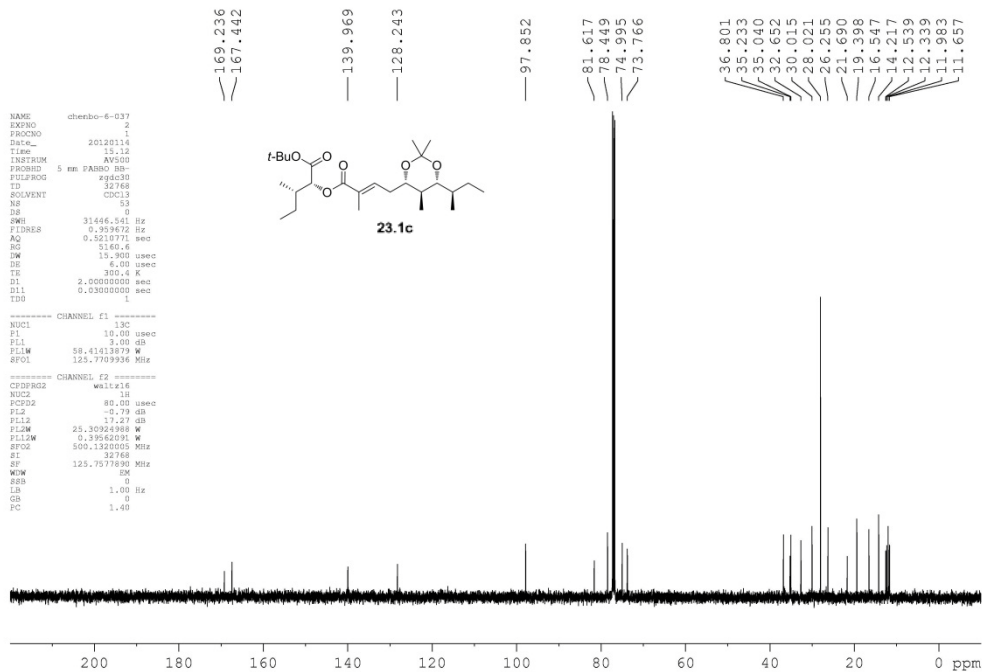



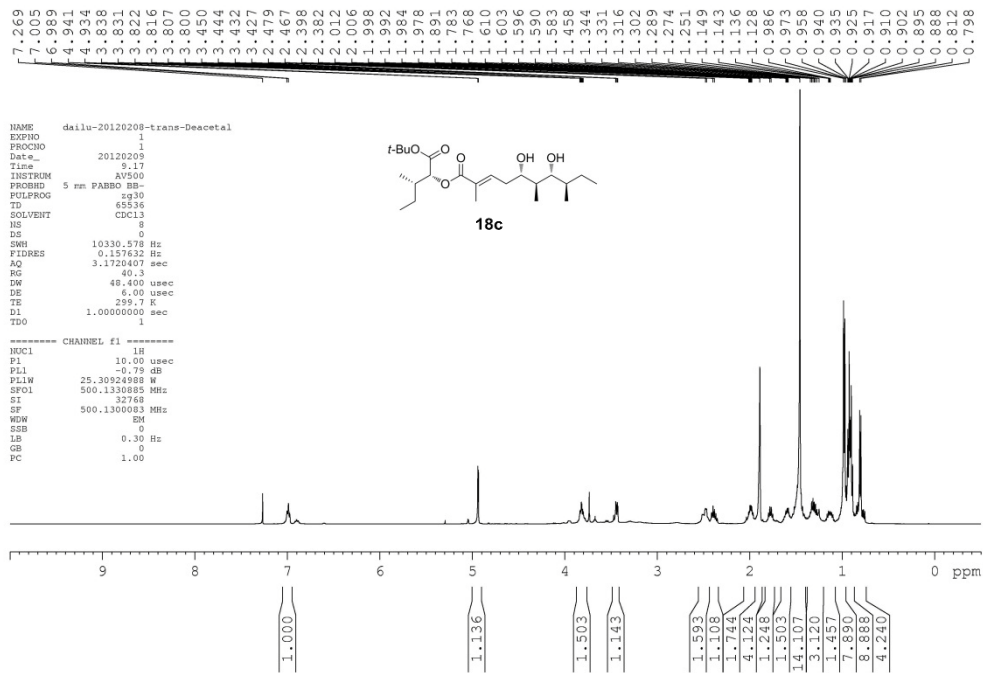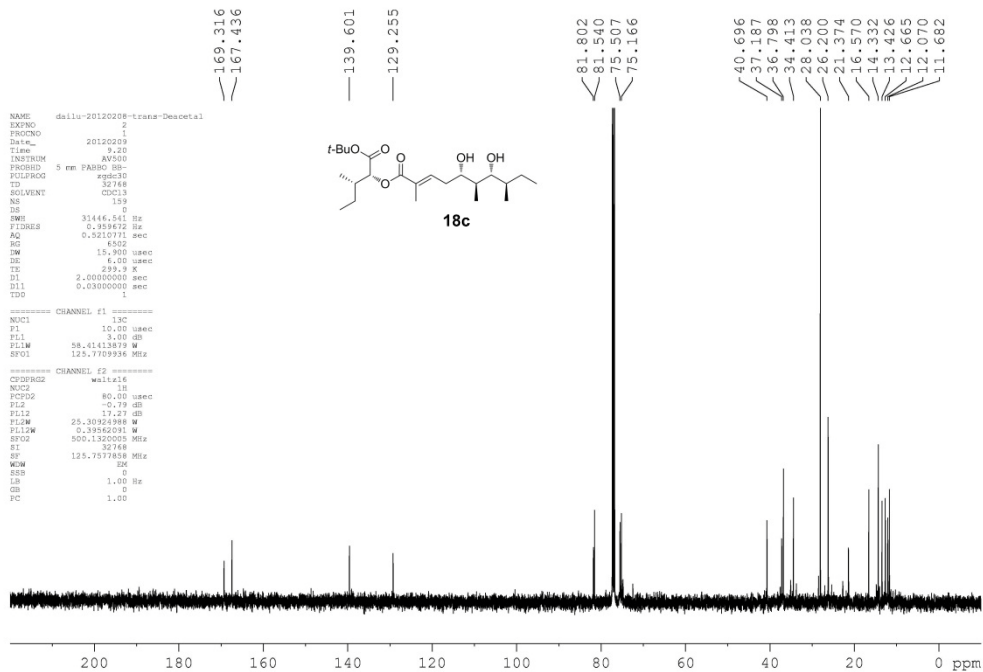

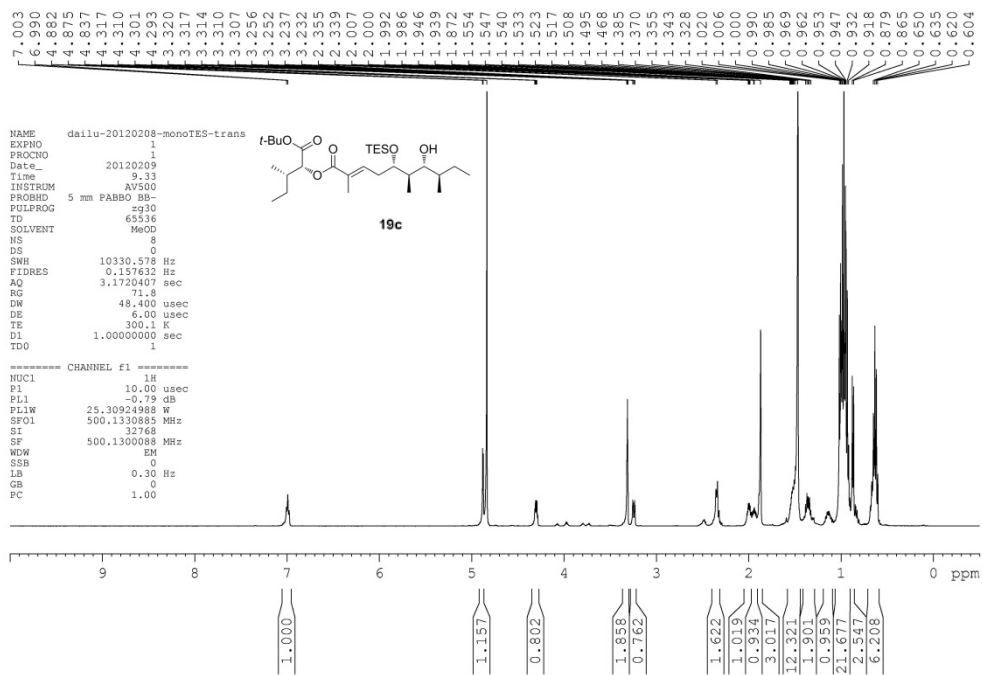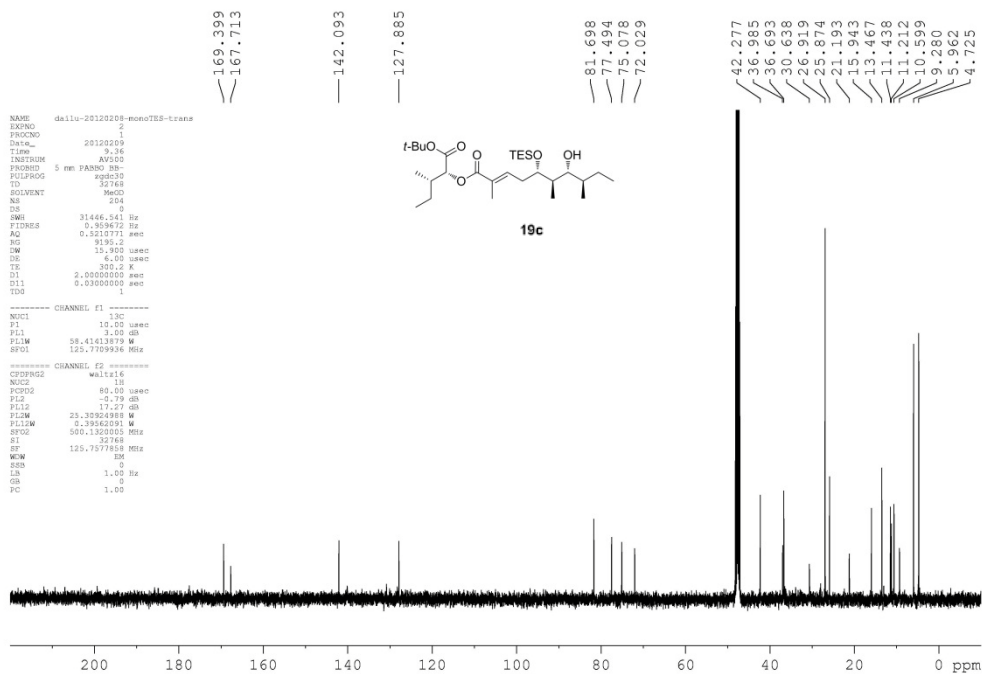

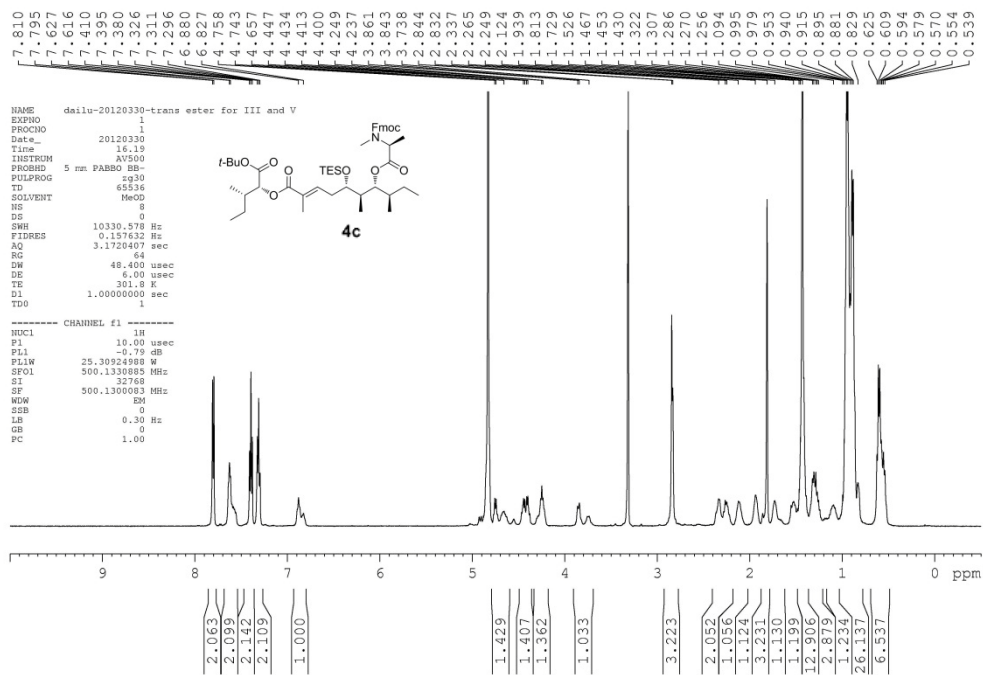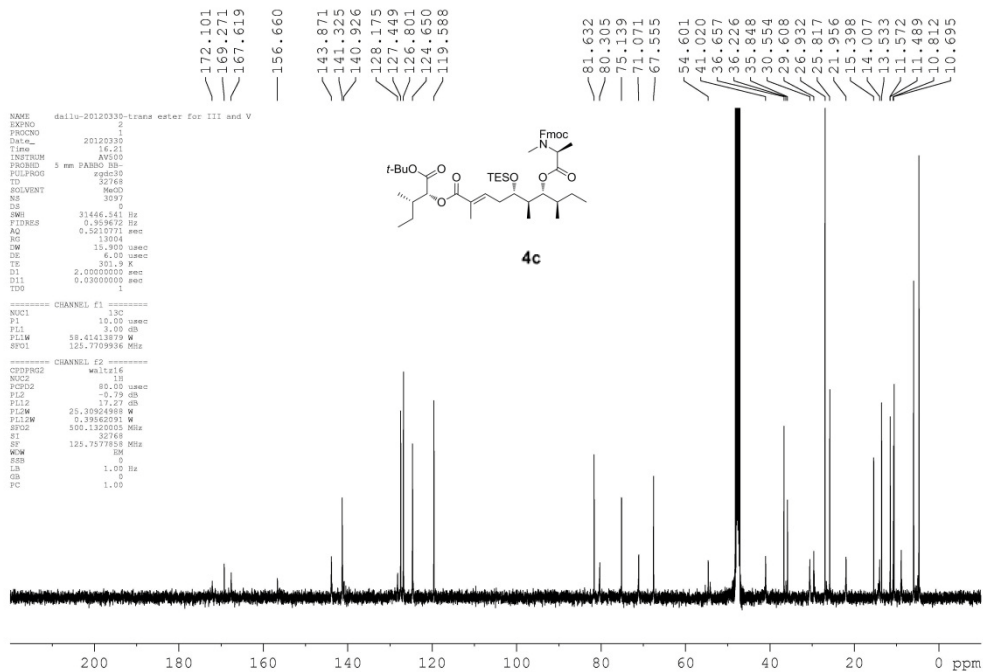

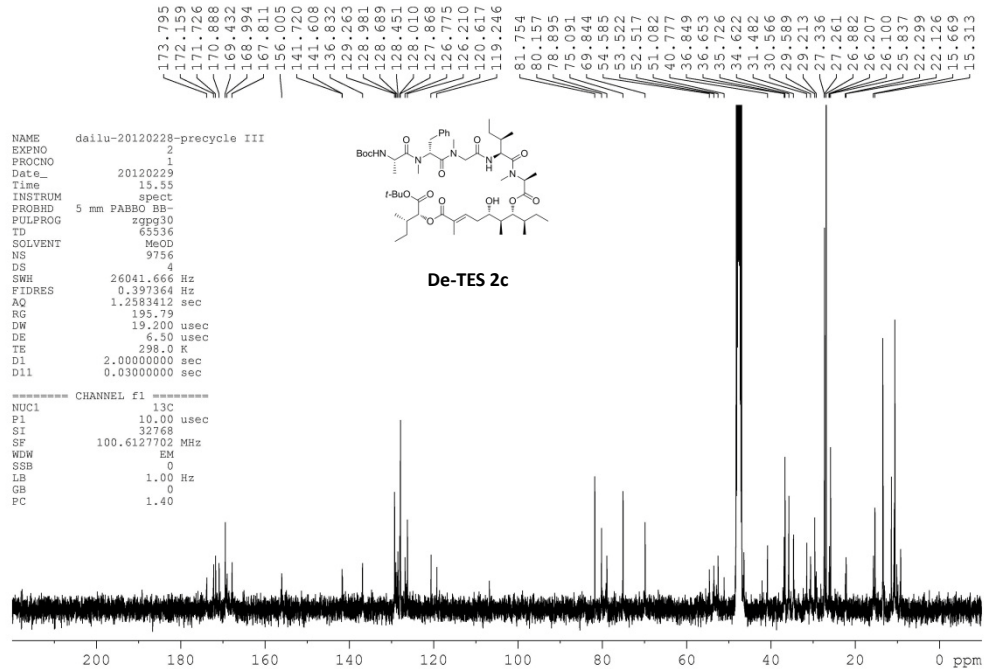

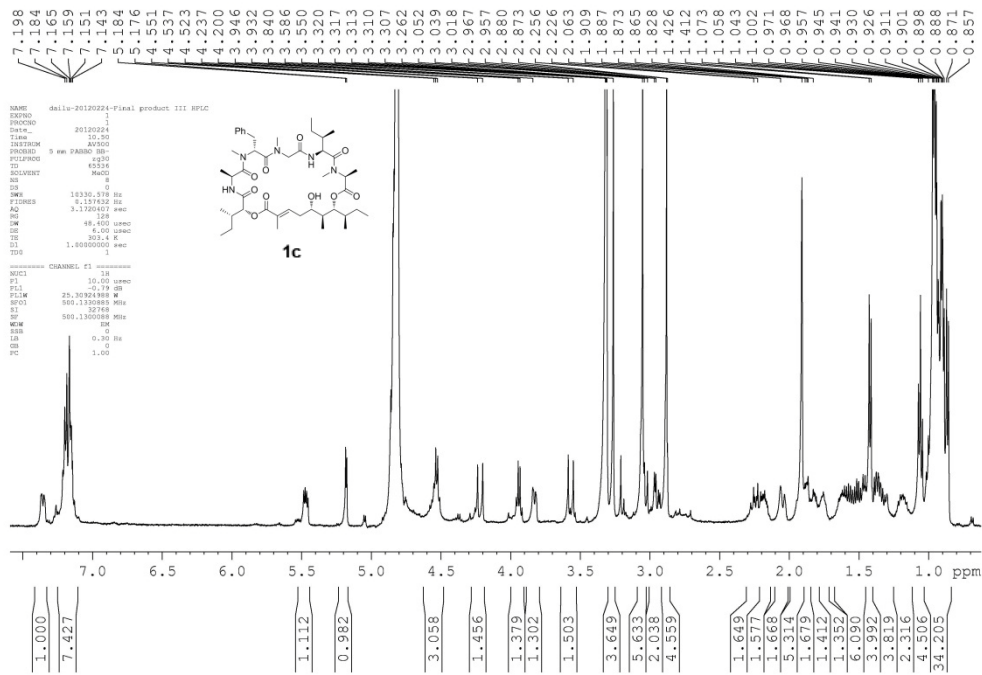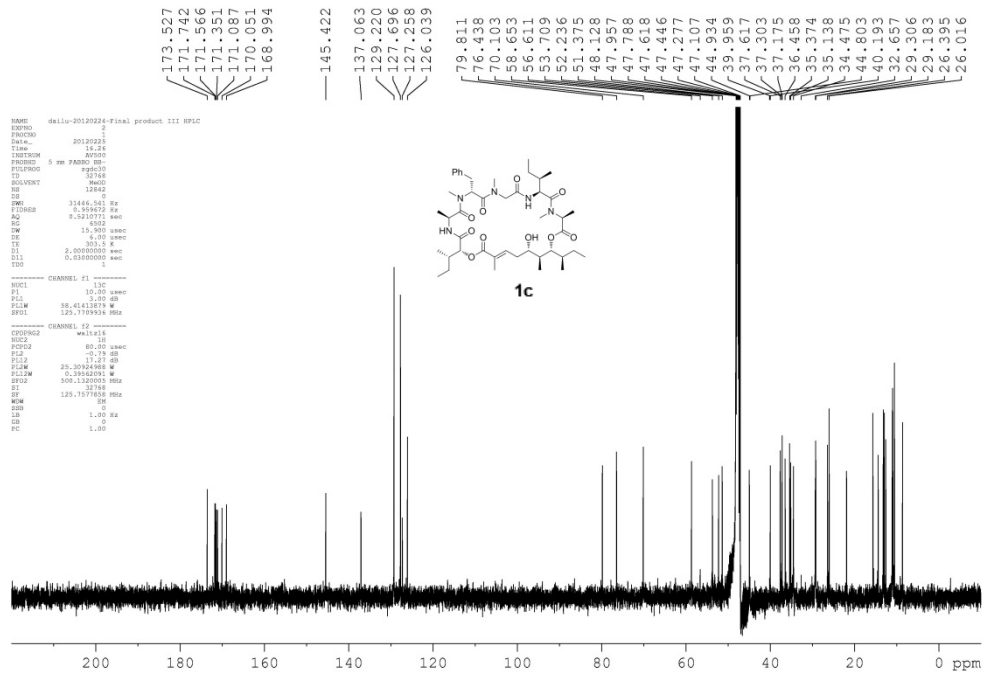

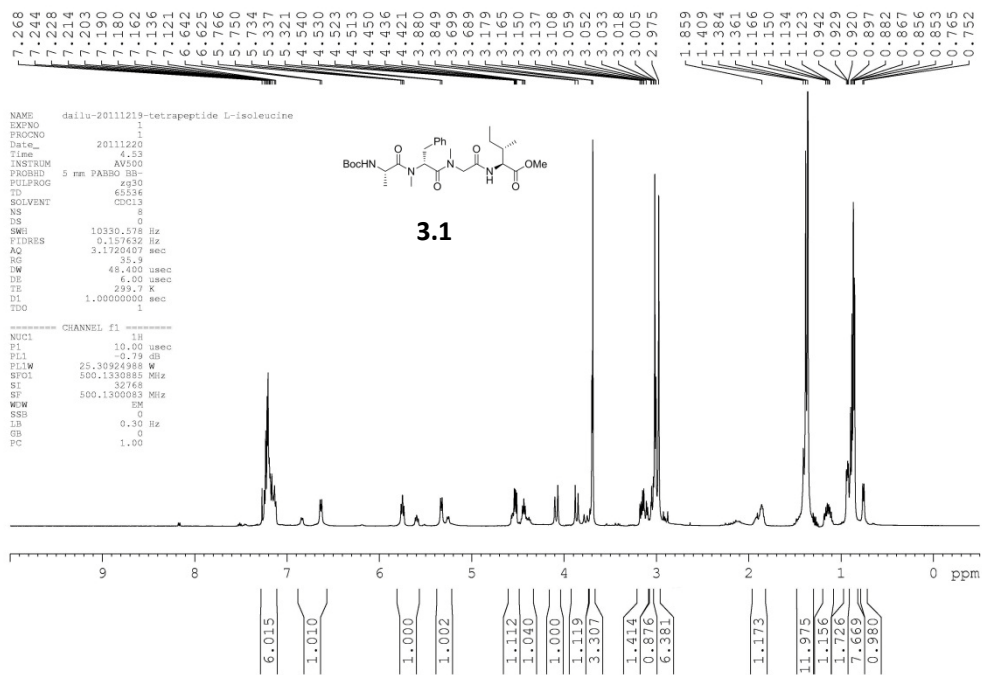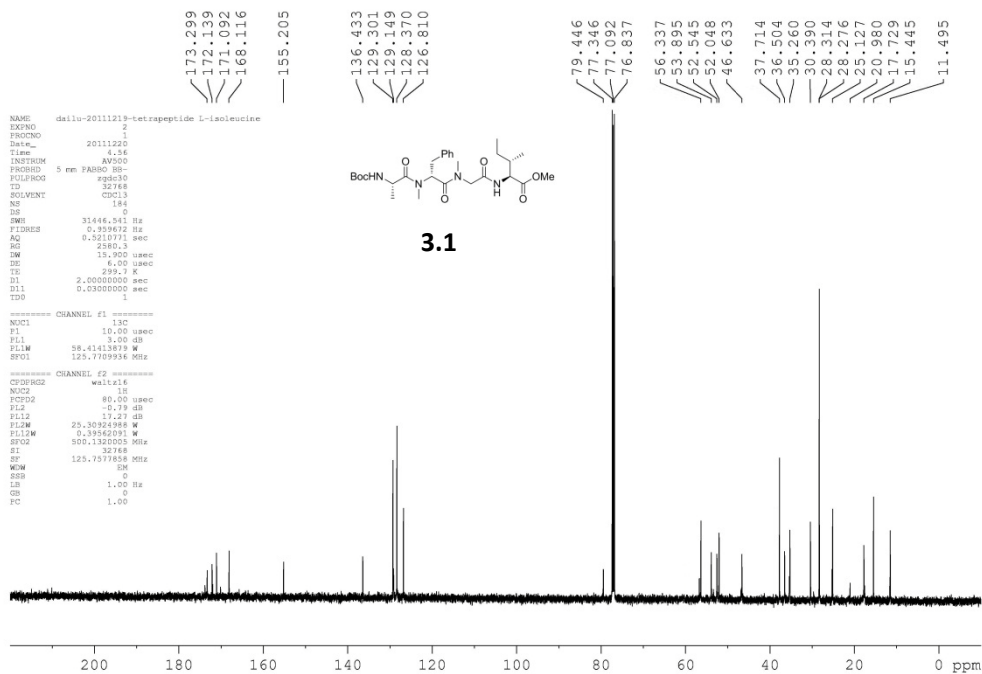

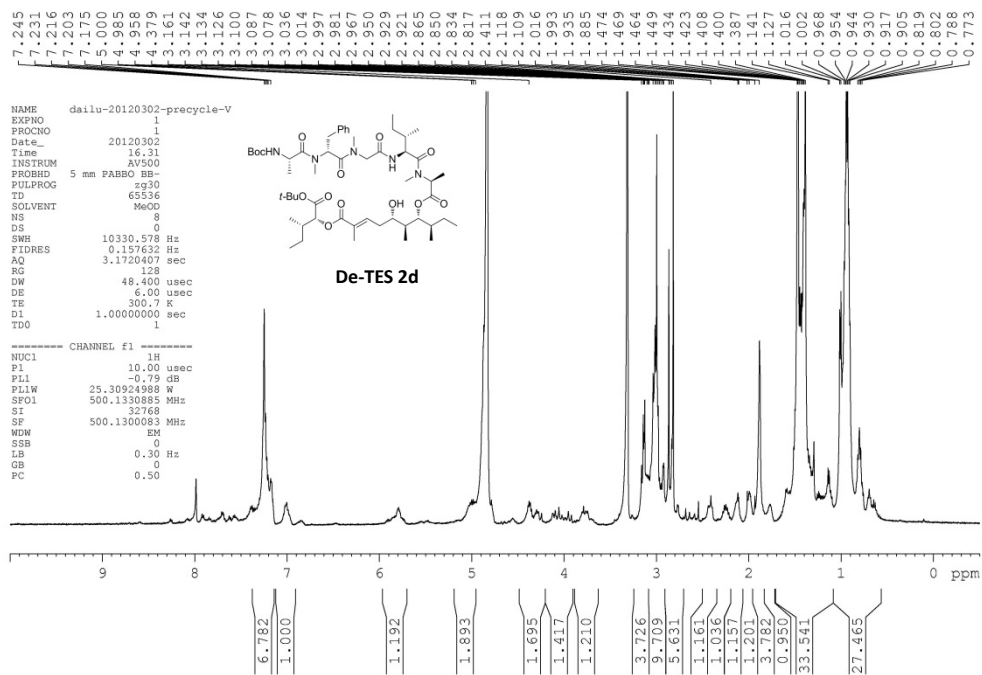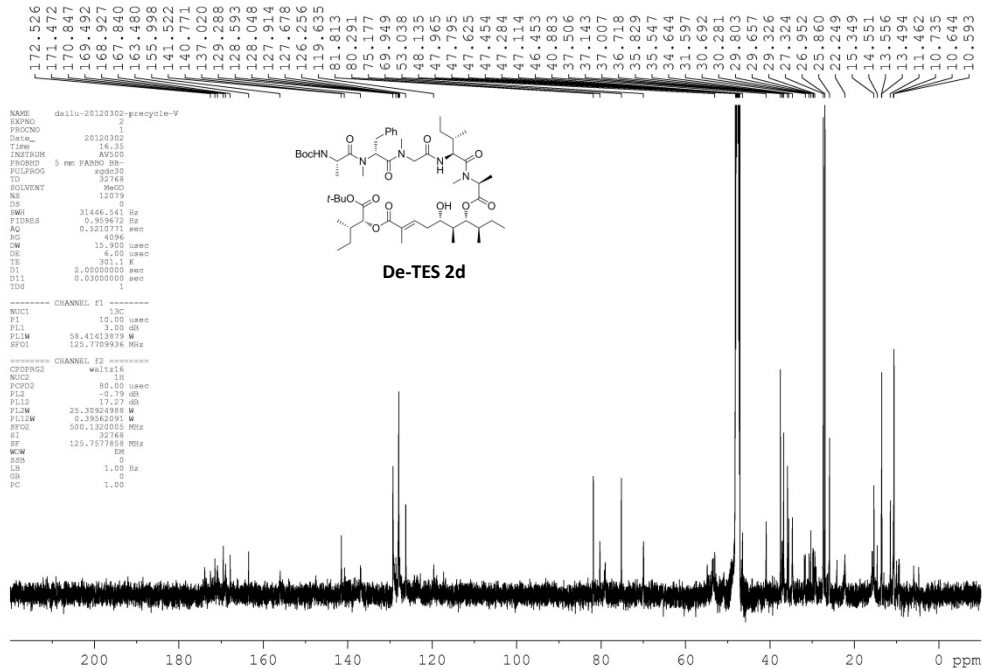



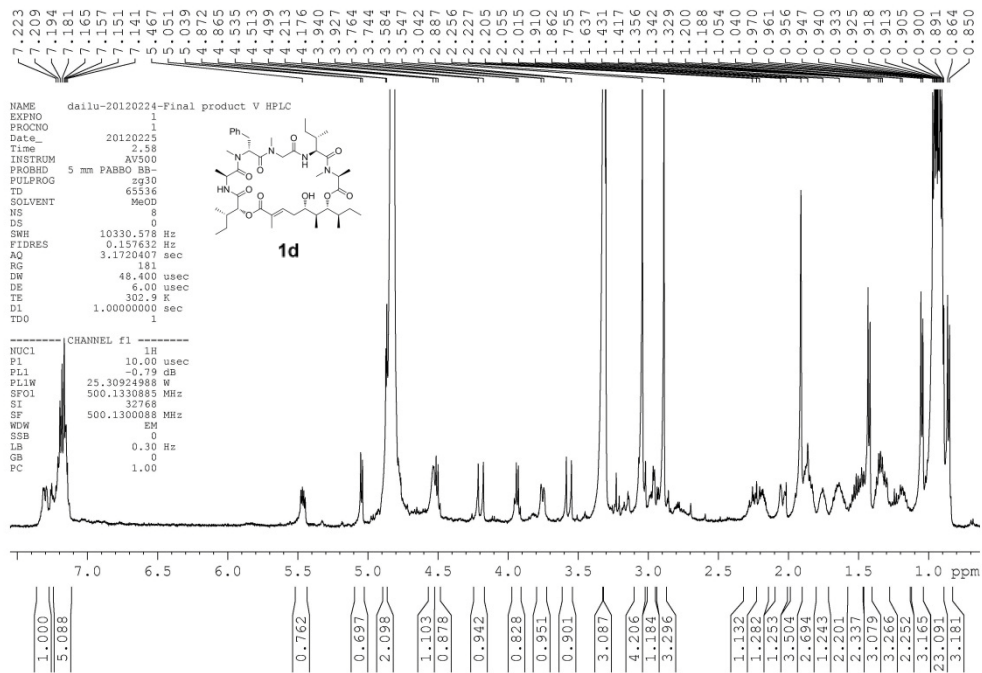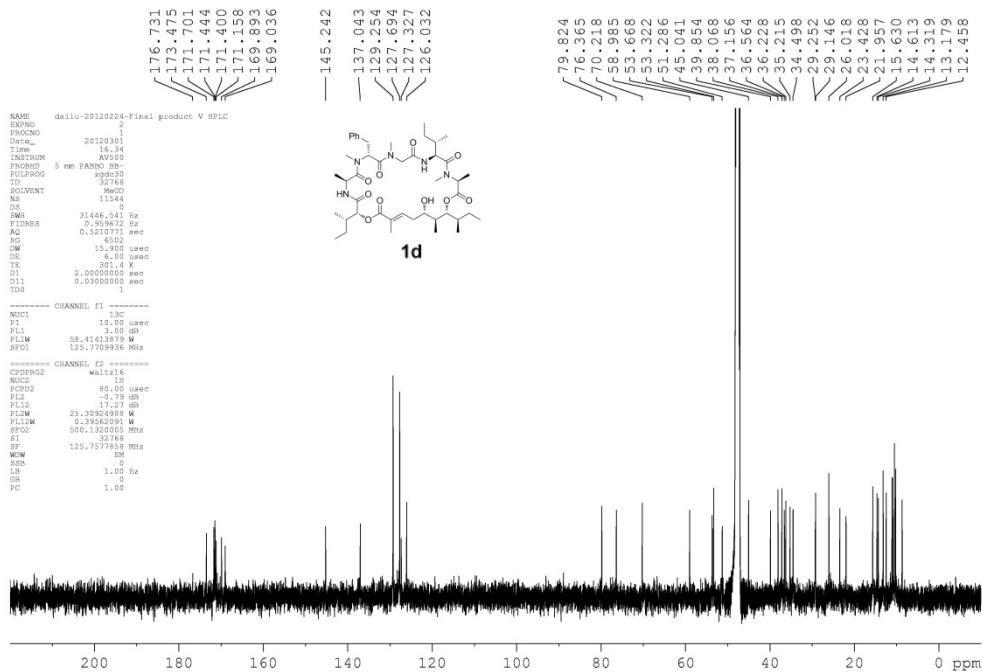



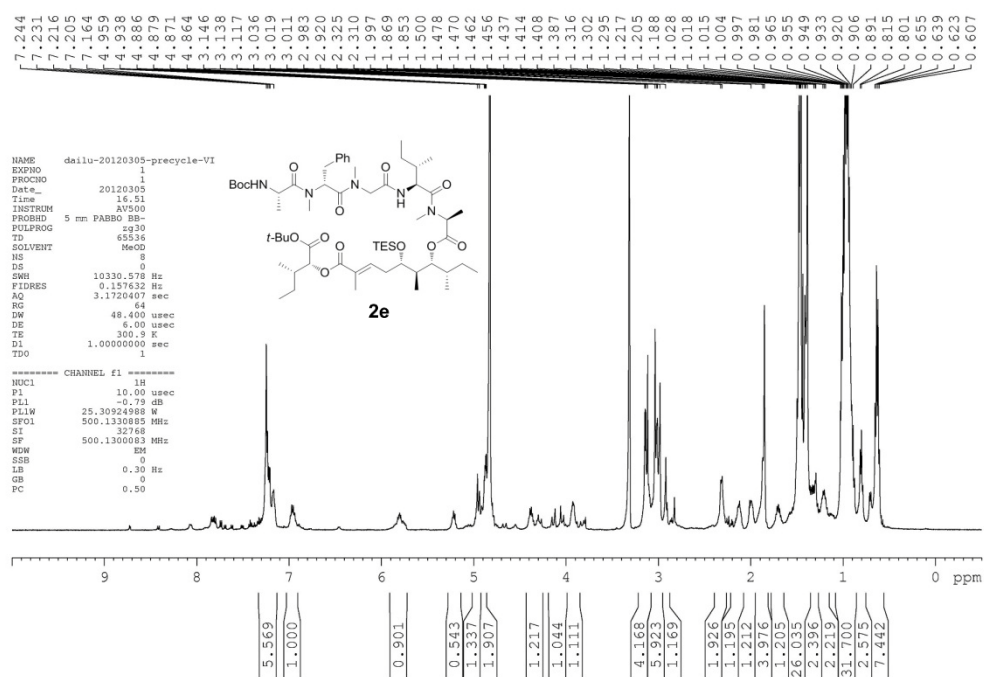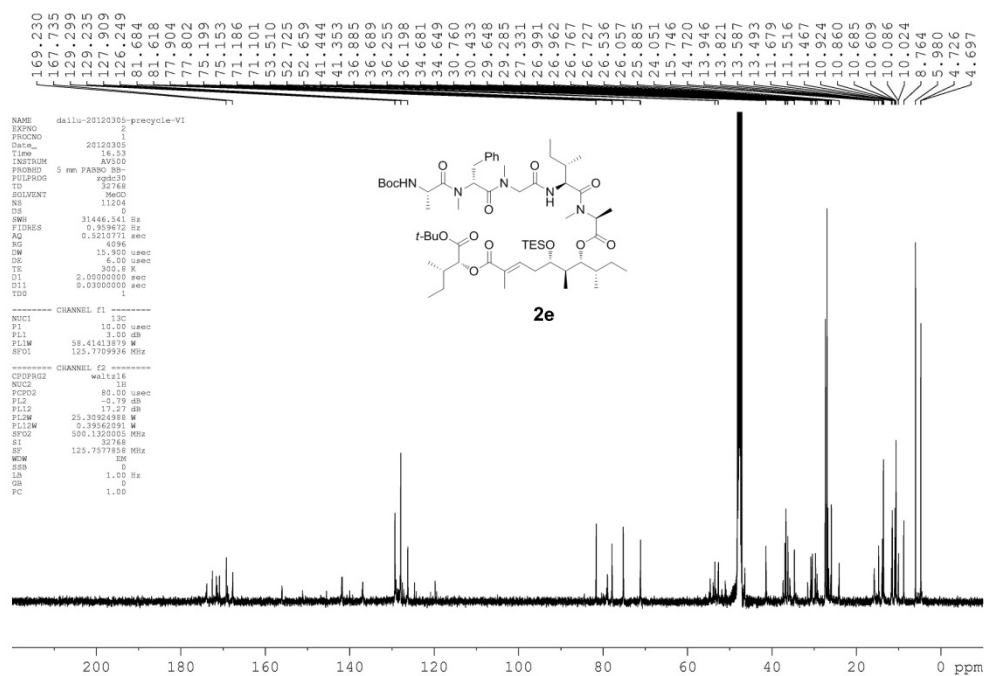

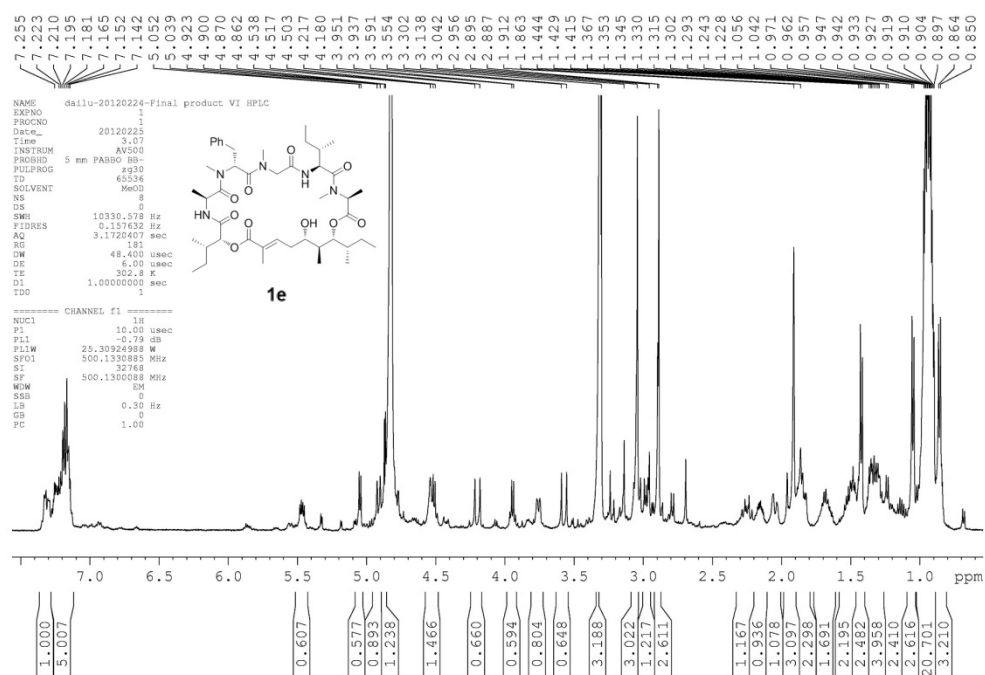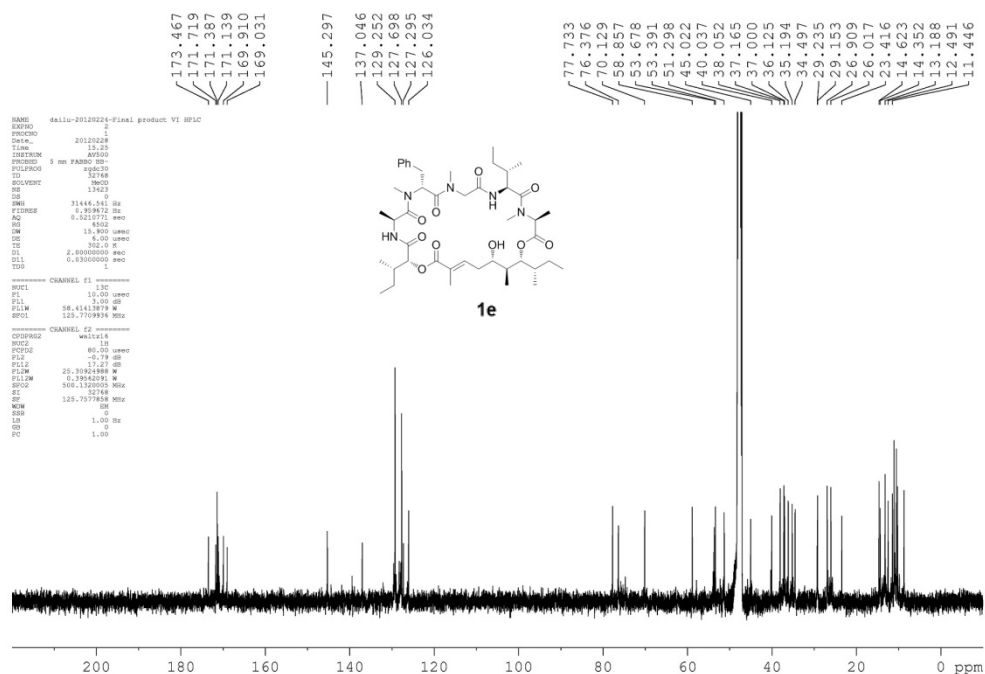

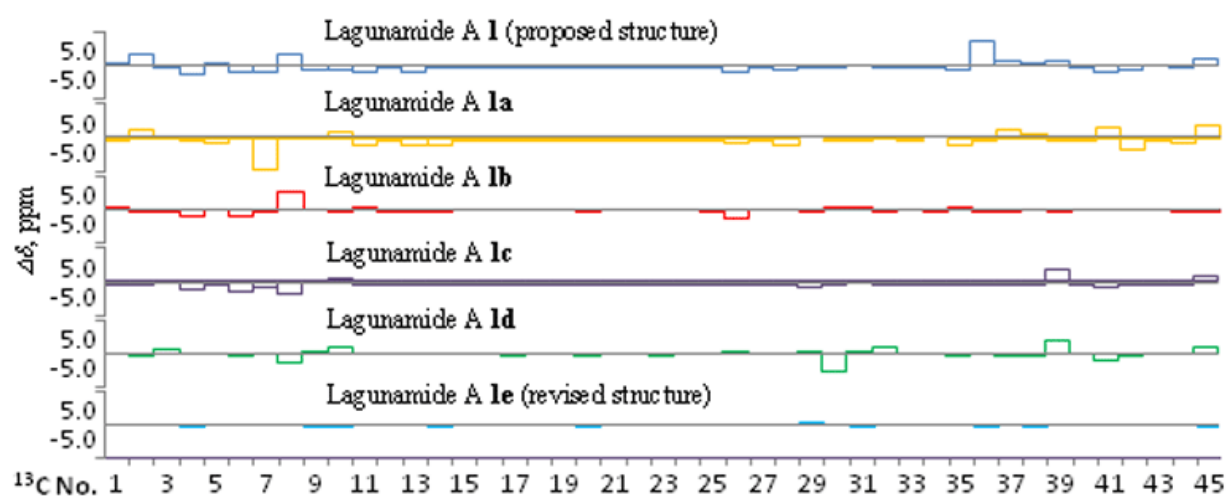

**Figure 3:** Differences in  $^{13}\text{C}$  NMR shifts between natural *lagunamide A* and six synthetic *lagunamides A* stereoisomers
